# 1 Function of BriC Peptide in the Pneumococcal Competence and Virulence 2 Portfolio

3  
4  
5 **Running Title:** Competence-induced peptide regulates biofilms and *in vivo* colonization

6  
7 Surya D. Aggarwal<sup>1</sup>

8 Rory Eutsey<sup>1</sup>

9 Jacob West-Roberts<sup>1</sup>

10 Arnau Domenech<sup>2</sup>

11 Wenjie Xu<sup>1</sup>

12 Iman Tajer Abdullah<sup>3,4</sup>

13 Aaron P. Mitchell<sup>1</sup>

14 Jan-Willem Veening<sup>2</sup>

15 Hasan Yesilkaya<sup>3</sup>

16 N. Luisa Hiller<sup>\*1,5</sup>

17  
18 <sup>1</sup>Department of Biological Sciences, Carnegie Mellon University, Pittsburgh, PA, USA

19 <sup>2</sup>Department of Fundamental Microbiology, Faculty of Biology and Medicine, University of  
20 Lausanne, Lausanne, Switzerland

21 <sup>3</sup>Department of Infection, Immunity & Inflammation, University of Leicester, Leicester, UK

22 <sup>4</sup>Department of Biology, College of Science, University of Kirkuk, Iraq

23 <sup>5</sup>Center of Excellence in Biofilm Research, Allegheny Health Network, Pittsburgh, PA, USA

24  
25 **\*Correspondence:**

26 N. Luisa Hiller

27 lhiller@andrew.cmu.edu

28  
29 **Keywords:** *Streptococcus pneumoniae*, biofilm, competence, colonization, secretome,  
30 comparative genomics, RUP.

31

32

33

## 34 **Abstract**

35 *Streptococcus pneumoniae* (pneumococcus) is an opportunistic pathogen that causes  
36 otitis media, sinusitis, pneumonia, meningitis and sepsis. The progression to this pathogenic  
37 lifestyle is preceded by asymptomatic colonization of the nasopharynx. This colonization is  
38 associated with biofilm formation; the competence pathway influences the structure and  
39 stability of biofilms. However, the molecules that link the competence pathway to biofilm  
40 formation are unknown. Here, we describe a new competence-induced gene, called *briC*, and  
41 demonstrate that its product promotes biofilm development and stimulates colonization in a  
42 murine model. We show that expression of *briC* is induced by the master regulator of  
43 competence, ComE. Whereas *briC* does not substantially influence early biofilm development  
44 on abiotic surfaces, it significantly impacts later stages of biofilm development. Specifically,  
45 *briC* expression leads to increases in biofilm biomass and thickness at 72h. Consistent with the  
46 role of biofilms in colonization, *briC* promotes nasopharyngeal colonization in the murine  
47 model. The function of BriC appears to be conserved across pneumococci, as comparative  
48 genomics reveal that *briC* is widespread across isolates. Surprisingly, many isolates, including  
49 strains from clinically important PMEN1 and PMEN14 lineages, which are widely associated  
50 with colonization, encode a long *briC* promoter. This long form captures an instance of  
51 genomic plasticity and functions as a competence-independent expression enhancer that may  
52 serve as a precocious point of entry into this otherwise competence-regulated pathway.  
53 Moreover, overexpression of *briC* by the long promoter fully rescues the *comE*-deletion  
54 induced biofilm defect *in vitro*, and partially *in vivo*. These findings indicate that BriC may  
55 bypass the influence of competence in biofilm development and that such a pathway may be  
56 active in a subset of pneumococcal lineages. In conclusion, BriC is a part of the complex  
57 molecular network that connects signaling of the competence pathway to biofilm development  
58 and colonization.

## 59 Introduction

60 Bacteria form sessile communities termed biofilms, where they interact with each other  
61 to engage in collaborative and/or competitive behaviors (1). In *Streptococcus pneumoniae*  
62 (pneumococcus), these cell-cell interactions are commonly mediated by secreted peptides that  
63 interact with both producing and neighboring cells of the same species, and induce changes in  
64 gene regulation that result in altered phenotypes (2). These dynamic pneumococcal biofilms  
65 occur in chronic otitis media, chronic rhinosinusitis and nasopharyngeal colonization (3–8).

66 The ability to form biofilms is a critical component of pneumococcal disease (9). Biofilms  
67 serve as reservoirs for acute infections (10). In the middle ear, cells released from a biofilm are  
68 thought to be responsible for recurrent episodes of infection (4). Bacterial cells released from  
69 nasopharyngeal biofilms can seed pneumococcal transmission between individuals by being  
70 incorporated into nasal shedding. Alternatively, these cells can disseminate to tissues causing  
71 mild to severe diseases, such as otitis media, pneumonia, and sepsis (10). Pneumococcal  
72 cells released from biofilms display increased virulence relative to their planktonic or biofilm  
73 counterparts, suggesting that chronic biofilms set the stage for the stimulation of a virulence  
74 program activated upon the dispersal of cells (11). Moreover, pneumococci in a biofilm display  
75 decreased susceptibility to antibiotics, and are recalcitrant to treatment (6). Thus, biofilms are  
76 an important component of pneumococcal epidemiology in transmission, maintenance of  
77 asymptomatic colonization, and development of disease.

78 The transcriptional program required for the initiation and the growth of pneumococcal  
79 biofilms has been the subject of numerous investigations. It is clear that at least two quorum  
80 sensing (QS) signal transduction pathways are critical for biofilm development: competence  
81 and Lux (7,12–15). The competence pathway has been the subject of intense investigation for  
82 decades (16–28). Competence is activated by a classic two-component system where the  
83 extracellular competence stimulating peptide (CSP, encoded by *comC*) binds to the surface

84 exposed ComD histidine kinase receptor, inducing its autophosphorylation and the subsequent  
85 transfer of the phosphate group to its cognate regulator, ComE (20,29). Activation of the  
86 competence pathway leads to increased expression of 5-10% of the pneumococcal genome in  
87 two main waves of gene expression (18,23). The first wave of induction is carried out directly  
88 by ComE; it upregulates a subset of competence genes (early genes) that include *comAB*,  
89 *comCDE*, as well as the alternative sigma factor, *comX*. The second wave of competence  
90 induction is regulated by ComX; it leads to an increase in the levels of at least 80 genes (late  
91 genes), that subsequently modulate important phenotypes such as transformation,  
92 metabolism, fratricide and biofilm formation (16,23,30). This competence program is  
93 upregulated during biofilm mode of growth *in vitro*, during interactions with human epithelial  
94 cells, and in lungs and brain after intranasal and intracranial challenges respectively in murine  
95 infection models (7,12,31). Importantly, in cell culture models, *comC* is required for biofilm  
96 development (12,14). Thus, activation of the competence pathway is important for productive  
97 biofilm formation and critical for pneumococcal infection and adaptation.

98         The Lux QS system also plays a role in biofilm formation. In this system, Lux QS is  
99 controlled by the AI-2 autoinducer, which is secreted and sensed by both Gram-positive and  
100 Gram-negative species. LuxS is a node in the regulation of competence, fratricide, and biofilm  
101 development (15,32). Lux upregulates competence via ComD and ComX (13). It contributes to  
102 bactericidal activity via upregulation of the choline binding murein hydrolase (CbpD). Through  
103 lysis, this bacteriocidal activity increases the levels of extracellular DNA, which is a key  
104 ingredient in the extracellular polymeric substance (EPS) that makes up the biofilm. Thus, the  
105 competence and Lux systems provide the molecular framework to coordinate multi-cellular  
106 bacterial communities to form and develop robust biofilms during infection.

107         Whereas the role of competence signaling in biofilm development is well established,  
108 the molecules that connect competence to biofilms are poorly understood (3,7,15,33). In this



109 study, we identify one such molecule that links competence and biofilms. We characterize the  
110 gene encoding BriC (**B**iofilm **r**egulating peptide **i**nduced by **C**ompetence), a novel colonization  
111 factor in the competence pathway. Levels of *briC* are regulated by ComE, and *briC* promotes  
112 biofilm development and nasopharyngeal colonization. Further, genomic analysis of *briC*  
113 reveals polymorphisms in its promoter, where a subset of strains encode a RUP (for **r**epeat  
114 **u**nit of **p**neumococcus) sequence, which leads to additional and CSP-independent expression  
115 of *briC*.

116

## 117 **Results**

### 118 **Identification of a competence-regulated Gly-Gly peptide**

119 We have identified the gene encoding a putative secreted peptide that is co-regulated  
120 with competence (*spd\_0391* (D39); *spr\_0388* (R6); *sp\_0429* (TIGR4)). Based on the results  
121 presented in this manuscript, we have termed it **B**iofilm-**r**egulating peptide **i**nduced by  
122 **C**ompetence (BriC). BriC was identified in our previously described *in silico* screen designed to  
123 capture cell-cell communication peptides in the pneumococcal genome (34). The known  
124 double glycine (Gly-Gly) streptococcal peptides are exported and proteolytically processed by  
125 dedicated ABC transporters that recognize N-terminal sequences with the Gly-Gly leader  
126 peptide (LSXXELXXIXGG)(20). In our previous work, we identified novel secreted  
127 pneumococcal peptides using a computational analysis to search for proteins with N-termini  
128 that contain a Gly-Gly leader. Our input set consisted of the alleles of two exported Gly-Gly  
129 peptides, the signaling molecule CSP and the bacteriocin BIP (20,35). Our output consisted of  
130 a position dependent probability matrix that captures the length and positional variability at  
131 each residue of the Gly-Gly motif. When we searched for this motif in a database of sixty  
132 streptococcal genomes, we defined a predicted secretome consisting of twenty-five sequence  
133 clusters, one of which corresponds to BriC (34).

134 To identify genes co-regulated with *briC*, we performed transcriptional studies using a  
135 NanoString probe set that reports on the abundance of the *briC* transcript as well as transcripts  
136 encoding a subset of pneumococcal regulators and cell wall proteins. We assessed the levels  
137 of *briC* transcript *in vitro* and *in vivo*. *In vitro* expression was measured by screening RNA  
138 extracted from mid-log planktonic cultures of a laboratory strain (R6-derivative (R6D)). *In vivo*  
139 expression was evaluated by analysis of middle-ear effusions recovered from chinchillas  
140 infected with a clinical PMEN1 strain. The mRNA levels of the *briC* were positively associated  
141 with *comC* and *comE* *in vitro* (strain R6D:  $R^2=0.61$  and  $0.79$ , respectively) and *in vivo* (strain  
142 PN4595-T23:  $R^2=0.92$  and  $0.88$ , respectively). It is noteworthy that changes in the expression  
143 of genes in this locus were observed in the studies that first documented the competence  
144 regulon (18,23). Specifically, Peterson and colleagues observed changes in *briC* levels,  
145 however the association between *briC* and CSP was below the statistical threshold (23).  
146 Further, Dagkessamanskaia and colleagues observed an upregulation in the gene  
147 downstream of *briC*, predicted to be in the same operon (18). Given that in strains R6, R6D,  
148 and D39, this downstream gene is truncated, this study does not explore the function of the  
149 downstream gene. In summary, our gene expression analysis suggests that *briC* is induced by  
150 competence.

151 To directly test whether *briC* is a competence-regulated peptide, we employed a fusion  
152 of the *briC* promoter to the *lacZ* reporter (R6 *PbriC-lacZ*). Stimulation of the signal transduction  
153 system that initiates competence by addition of CSP1 led to an induction of the  $\beta$ -  
154 galactosidase activity by about twenty-five-fold (**Fig. 1**). Induction of the *briC* promoter was  
155 specific to the CSP phenotype encoded by strain R6. The  $\beta$ -galactosidase activity was  
156 observed upon addition of CSP1, the CSP phenotype from strain R6, but not upon addition of  
157 the non-cognate CSP2 phenotype (**Fig. 1**). Thus, we conclude that *briC* is a competence-  
158 responsive gene.

159

## 160 **Levels of *briC* transcripts are directly regulated by ComE**

161 Our *in silico* analysis of the *briC* promoter in strains R6 and R6D revealed the presence  
162 of a ComE-binding site. ComE binds a well-defined sequence consisting of two imperfect direct  
163 repeats of nine nucleotides separated by a gap of twelve or thirteen base pairs (36). Our  
164 analysis of the putative *briC* promoter across pneumococcal strains revealed an excellent  
165 match to the ComE-binding box (**Fig. 2A**). To further investigate the association between  
166 ComE and *briC*, we tested whether CSP-induction of *briC* requires ComE. We compared the  
167 CSP-induction of *briC* in a wild-type (R6D WT) strain to that of an isogenic *comE*-deletion  
168 mutant (R6D $\Delta$ *comE*), using qRT-PCR analysis. In WT cells, the addition of CSP triggered a  
169 significant increase in levels of *briC* at 10 minutes post-addition, with levels slowly decreasing  
170 by 15 minutes (**Fig. 2B**). This trend follows the temporal pattern observed for the levels of  
171 *comE* that has been associated with genes under direct controls of ComE (18,23). In contrast,  
172 the transcript levels of *briC* were unaffected by CSP addition in the  $\Delta$ *comE* strain, indicating  
173 that the expression of *briC* requires ComE (**Fig. 2B**). These results strongly suggest that *briC*  
174 is directly regulated by ComE. In addition, ComE plays a critical role in controlling  
175 transformation, thus we investigated whether *briC* impacts transformation efficiency  
176 (**Supplementary Results and Fig. S1**). We find that absence of *briC* leads to only a minor  
177 decrease in transformation efficiency.

178

## 179 **BriC plays a key role in biofilm development**

180 To investigate whether expression of *briC* plays a role in biofilm development, we  
181 compared biofilm formation across WT (R6D WT), *briC* deletion mutant (R6D $\Delta$ *briC*), and *briC*  
182 complemented (R6D $\Delta$ *briC*::*briC*) strains grown on an abiotic surface at 24h and 72h post-  
183 seeding. No difference was observed in biofilm biomass and thickness at 24h post-seeding,

184 suggesting that expression of *briC* does not contribute to early stages of biofilm formation (**Fig.**  
185 **3A, B**). In contrast, at 72h post-seeding,  $\Delta$ *briC* biofilms displayed significantly reduced  
186 biomass and thickness when compared to WT (**Fig. 3C, D**). Further, biofilms with  $\Delta$ *briC*::*briC*  
187 cells restored the WT phenotype at this time-point (**Fig. 3C, D**). The indistinguishable biofilm  
188 parameters of WT and  $\Delta$ *briC* cells at 24h post-seeding suggests that there is no fitness-related  
189 growth difference between the strains and indicates that the biofilm defect is biologically  
190 relevant. These findings suggest that *briC* contributes to late biofilm development.

### 191 192 ***briC* is widely distributed across pneumococcal strains**

193 To investigate the prevalence of *briC*, we investigated its distribution across the  
194 genomes of pneumococcus and related streptococci. To place the distribution in the context of  
195 phylogeny, we used a published species tree generated from a set of fifty-five genomes  
196 (34,38) (**Table S1**). The genomes encompass thirty-five pneumococcal genomes that span  
197 twenty-nine multi-locus sequence types as well as eighteen serotypes and nontypeable  
198 strains; eighteen genomes from related streptococcal species that also colonize the human  
199 upper respiratory tract, namely *S. pseudopneumoniae*, *S. mitis*, and *S. oralis*; and finally, two  
200 distantly related *S. infantis* strains as an outgroup. In this set, all the pneumococcal genomes  
201 encode *briC*, and there are two highly similar alleles (labeled allele 1A and 1B, **Fig 4A, B**).  
202 Further, we identified four additional alleles in the related streptococci (**Fig. 4A, File S1**). Next,  
203 we extended this analysis to a set of 4,034 pneumococcal genomes available in the pubMLST  
204 database (these correspond to all the genomes with at least 2Mb of sequence) (39). In total,  
205 98.5% (3,976 out of 4,034) of these genomes encode a *briC* allele, suggesting *briC* is highly  
206 prevalent across pneumococcal strains. We find that alleles 1A and 1B are prominent in this  
207 larger set, with 1,824 and 1,187 representatives respectively. After manual curation, we  
208 retrieved nineteen distinct *briC* alleles across these pneumococcal genomes (**Fig. 4B**). Six of

209 the polymorphic residues are located in the putative leader sequence. The conserved region of  
210 the leader sequences corresponds to the amino acids preceding the Gly-Gly (20,34), thus the  
211 polymorphisms at the N-terminal end of the BriC sequence are not predicted to influence  
212 export. One polymorphic residue replaces the glycine in the Gly-Gly motif with a serine; it  
213 seems probable that this variation may influence processing and/or export. In addition, position  
214 -2 from the C-terminus encodes either an alanine or a threonine. This variation is at the C-  
215 terminus, predicted to be the functional end of the molecule, such that the difference in size  
216 and polarity at this residue is likely to impact structure or binding of BriC to its targets. The *briC*  
217 gene is induced by competence, so we investigated whether there is a correlation between  
218 CSP phenotypes and alleles encoding BriC. However, we did not find these to be associated  
219 (**Table S2**). Finally, to investigate the distribution of *briC* in other species and genera, we used  
220 BLASTp to search the non-redundant database (40). We find that BriC homologs are present  
221 in strains of related streptococci, *S. pseudopneumoniae*, *S. mitis* and *S. oralis*, but we did not  
222 identify homologues in more distant species. The phylogenetic distribution of *briC* supports a  
223 conserved role across pneumococci and a subset of related streptococcal species.

224

### 225 **Inter-strain differences in the *briC* promoter are associated with diverse regulation of** 226 ***briC* in clinically important lineages**

227 Our analysis of the promoter region of *briC* in our curated set of genomes reveals that a  
228 subset of strains encode for a 107 bp insertion within the region upstream of *briC* (**Fig. 4**). The  
229 additional nucleotides are located after the ComE-binding site and before the transcriptional  
230 start site, and correspond to a repeat unit in pneumococcus (RUP) sequence (41,42). RUP is  
231 an insertion sequence derivative with two clear variants, which may still be mobile (42). The  
232 RUP sequence upstream of *briC* corresponds to RUPB1.

233 In our curated genomes, the long RUP-encoding promoter is present in multiple strains,  
234 including those from the clinically important PMEN1 and PMEN14 lineages (**Fig. 4A**). Using  
235 our expanded database of 4,034, we determined that the vast majority of the PMEN1 and  
236 PMEN14 genomes encode a long promoter. The high prevalence of the long promoter in these  
237 lineages suggests that this form was present in the ancestral strains from these lineages  
238 and/or provides a fitness advantage in these genomic backgrounds.

239 To investigate how this genomic difference influences *briC* expression, we generated a  
240 LacZ reporter strain. The 263bp upstream of *briC* from the PMEN1 strain, PN4595-T23, were  
241 fused to *lacZ* to produce the *PbriC<sub>long</sub>-lacZ* reporter, and its reporter activity was compared to  
242 that of the *PbriC-lacZ* generated with the fusion of 159bp upstream of *briC* obtained from strain  
243 R6. To control for the possibility that the influence of the RUP sequence might be strain-  
244 dependent, we tested these reporter constructs in the R6 and the PMEN1 backgrounds, in  
245 both the absence and presence of CSP treatment (**Fig. 5A, B**). The presence of RUP  
246 dramatically increased the basal levels of *briC* in the absence of CSP, and this increase was  
247 observed in both R6 and PMEN1. Furthermore, both constructs were induced upon the  
248 addition of CSP. These findings suggest that the RUP sequence serves as an expression  
249 enhancer; it increases the levels of *briC* transcripts and this increase is CSP-independent.  
250 Thus, in some lineages, *briC* appears to be under the control of both CSP-dependent and  
251 CSP-independent regulation.

252

### 253 **Expression of *briC* driven by the long promoter bypasses the impact of competence** 254 **induction in biofilm development**

255 Next, we investigated the biological impact of the natural variations in the *briC* promoter  
256 on biofilm development. It has been well established that competence promotes biofilm  
257 development. Specifically, deletion of the *comC* (encodes CSP) and *comD* (encodes histidine

258 kinase of competence TCS) genes lead to a reduction in *in vitro* biofilms in strains D39 and  
259 TIGR4 (7,12). In this study, we have established that *briC* also promotes biofilm development  
260 (**Fig. 3B**), and that the RUP-containing long promoter serves as an expression enhancer (**Fig.**  
261 **5**). Thus, we hypothesized that expression of *briC* from the long promoter may bypass the  
262 impact of competence in biofilm development.

263 First and in concurrence with previous work, we observed that a strain with a *comE*  
264 deletion (R6D $\Delta$ *comE*) displays a reduction in biofilm biomass and thickness relative to the WT  
265 strain (**Fig. 6A, B**). ComE influences the expression of numerous genes. To determine  
266 whether the biofilm defects were primarily due to its impact on *briC* induction, we  
267 tested a construct with a disruption of the ComE-binding box in the *briC* promoter  
268 ( $\Delta$ *briC*::*PbriC*<sub>Shuffled ComE-box</sub>-*briC*). This strain displays a significant reduction in biofilm biomass  
269 and thickness relative to the WT strain (**Fig. 6A, B**). Moreover, no difference was observed in  
270 the biofilm parameters for both of these mutants, suggesting that the absence of *briC*  
271 expression is a contributor to the *in vitro* biofilm defect in the *comE* deletion mutant. Next, we  
272 determined that a strain with increased basal levels of *briC* driven by the RUP-containing long  
273 promoter (R6D $\Delta$ *comE*::*PbriC*<sub>long</sub>-*briC*) fully rescued the biofilm defect observed in R6D $\Delta$ *comE*  
274 (**Fig. 6A, B**). In addition, increased expression of *briC* in the wild type background (R6D  
275 WT::*PbriC*<sub>long</sub>-*briC*) did not lead to a significant increase in biofilm biomass and thickness  
276 relative to the wild type (**Fig. 6A, B**). Together, these data strongly suggest that *briC* is a  
277 critical molecular link between competence and biofilm formation, and that natural variations in  
278 the *briC* promoter are physiologically relevant.

### 279 **ComAB plays a role in secretion of the protein encoded by *briC***

281 Since BriC is associated with the competence pathway and is able to rescue the biofilm  
282 defects associated with competence signaling, we investigated whether competence



283 associated transporters play a role in exporting BriC. In pneumococcus, the ComAB and  
284 BlpAB C39-peptidase transporters export peptides with a Gly-Gly leader (43–45). These  
285 transporters recognize the N-terminal leader of target sequences, and cleave these sequences  
286 at the Gly-Gly motif (45,46). In strains R6 and R6D, BlpAB is not functional due to a frameshift  
287 mutation that leads to an early stop codon (47). Thus, we hypothesized that as a Gly-Gly  
288 peptide co-expressed with genes of the competence pathway, BriC may be exported via the  
289 ComAB transporter. We tested this hypothesis in two ways. First, we measured whether  
290 deletion of *comAB* influences the ability of a strain with competence-independent expression of  
291 *briC* to rescue the  $\Delta comE$ -biofilm defect. Second, we compared secretion of a BriC reporter  
292 construct in a WT strain with that in a *comAB* deletion mutant.

293 Our biofilm data suggests that ComAB plays a role in transporting BriC. At 72h post-  
294 seeding, a *comE/comAB*-double deletion mutant strain expressing *briC* from the RUP-  
295 encoding long promoter ( $R6D\Delta comE\Delta comAB::P_{briC_{long}}-briC$ ) displayed a biofilm with reduced  
296 biomass and thickness when compared to the equivalent construct in a *comE*-deletion  
297 background ( $R6D\Delta comE::P_{briC_{long}}-briC$ ) (**Fig. 7A, B**). However, the biofilm levels were not  
298 reduced to the levels observed in the  $\Delta comE$  strain. These results suggest that under these  
299 conditions, ComAB may not be the only transporter that contributes to the export of BriC.

300 To further elucidate the role of ComAB in the export of BriC, we employed the HiBiT tag  
301 detection system, which was recently used to detect secretion of BlpI (44). The HiBiT tag  
302 corresponds to an 11-residue peptide. The assay works by addition of an inactive form of  
303 luciferase (LgBit) to the extracellular milieu. When both LgBit and HiBiT combine, they  
304 generate bioluminescence (48,49). To study BriC transport, we fused the putative BriC leader  
305 sequence to the HiBiT tag and expressed this reporter under the control of the native (short)  
306 *briC* promoter in WT and  $\Delta comAB$  R6-strains. We measured the extracellular bioluminescence



307 produced by this reporter both in the presence and absence of CSP (**Fig. 7C, Table S3**). In the  
308 absence of CSP, the levels of secreted HiBiT resembled that of background (WT cells without  
309 HiBiT), consistent with very low expression of N-terminal BriC-HiBiT as well as low expression  
310 of the ComAB transporter. In the WT background, upon addition of CSP, N-terminal BriC-HiBiT  
311 is induced and the extracellular level of HiBiT is significantly increased, consistent with HiBiT  
312 export. In contrast, in the  $\Delta comAB$  background, upon addition of CSP, N-terminal BriC-HiBiT is  
313 induced but the extracellular levels of HiBiT do not substantially increase, consistent with lack  
314 of HiBiT export. Combined, these results strongly suggest that ComAB serves as a transporter  
315 for BriC.

316

### 317 **BriC is important for *in vivo* colonization**

318 During nasopharyngeal colonization, pneumococci form biofilms and upregulate the  
319 competence pathway. Thus, we investigated the role of *briC* in nasopharyngeal colonization  
320 using an experimental murine colonization model. Our *in vitro* investigations have been  
321 performed using strain R6D strain, which is defective in colonization due to the absence of a  
322 capsule. Thus, we performed colonization experiments with the serotype 2 strain, D39, which  
323 is the ancestor of strain R6 (50). Mice were colonized with D39 WT, the *briC*-deletion mutant  
324 ( $D39\Delta briC$ ) or the *briC*-complemented ( $D39\Delta briC::briC$ ) strains. Comparison of the number of  
325 bacteria in nasal lavages immediately after inoculation revealed that mice in the three cohorts  
326 received the same number of bacteria. In contrast, nasal lavages at three and seven days  
327 post-inoculation revealed decreased levels of  $D39\Delta briC$  relative to WT in the nasal wash (**Fig.**  
328 **8A**). Furthermore, the WT levels were restored in the complemented strain (**Fig. 8A**). These  
329 findings indicate that *briC* encodes a novel colonization factor.

330 In *in vitro* biofilms, *briC* links competence to biofilms. First, disruption of the ComE-  
331 binding box in the *briC* promoter led to a biofilm defect similar to that observed in a  $\Delta comE$

332 strain. Second, overexpression of *briC* driven by the long version of the promoter was found to  
333 restore the competence-dependent defect in *in vitro* biofilm development. Thus, we  
334 investigated the behavior of these strains in the pneumococcus colonization model. We found  
335 that the strain with a disruption of the ComE-binding box ( $\Delta briC::P briC_{Shuffled\ ComE\text{-}box}\text{-}briC$ )  
336 within the *briC* promoter was defective for colonization, the decreased bacterial counts  
337 resembled those in the  $\Delta comE$  strain (**Fig. 8B**). These findings suggest that *briC* is a  
338 substantial mediator of the role of ComE on colonization. Further, addition of this long *briC*  
339 promoter to  $\Delta comE$  cells ( $D39\Delta comE::P briC_{long}\text{-}briC$ ) partially rescues the colonization defect  
340 of the  $D39\Delta comE$  strain. That is, the numbers of bacterial cells of strain  $D39\Delta comE::P briC_{long}\text{-}$   
341 *briC* recovered from the nasal lavages at both three and seven days post-inoculation were  
342 significantly higher than the numbers of  $D39\Delta comE$  cells recovered, but less than that of the  
343  $D39$  WT (**Fig. 8B**). Finally, the overexpression of *briC* in the WT background ( $D39$   
344  $WT::P briC_{long}\text{-}briC$ ) does not impact colonization. Thus, we conclude that BriC is a contributor  
345 to the competence-induced stimulation of nasopharyngeal colonization observed in strain  $D39$ .  
346 Further, natural variations leading to a long *briC* promoter appear to dampen the impact of  
347 competence in colonization.

348

## 349 Discussion

350 An important component of pneumococcal pathogenesis is its ability to form complex  
351 biofilm structures. Pneumococci in a biofilm mode of growth display decreased sensitivity to  
352 antibiotics and increased resistance to host immune responses (6). These properties make the  
353 bacteria recalcitrant to treatment and highlight the need to better understand the molecular  
354 mechanisms that drive biofilm development. Activation of the competence pathway is critical  
355 for biofilm development. Previous *in vitro* studies have demonstrated that while cell-adherence  
356 and early biofilm formation are competence-independent, an intact competence system is

357 required in the later stages of biofilm development. It was shown that the competence pathway  
358 positively influences structure and stability of late stage biofilms (12). However, the molecules  
359 downstream of competence activation by ComDE that regulate biofilm development remain  
360 poorly understood. In this study, we present BriC, a previously uncharacterized peptide, that  
361 we show is regulated by competence and plays a role in promoting biofilm development and  
362 nasopharyngeal colonization.

363 We have presented extensive evidence that *briC* is a competence regulated gene. We  
364 have shown that induction of *briC* is triggered by addition of CSP and requires ComE. Further,  
365 we have also shown that the *briC* promoter encodes the consensus ComE-binding box, and  
366 that *briC* expression follows the temporal pattern described for genes directly regulated by  
367 ComE. Previous studies have used microarray analysis to identify pneumococcal genes  
368 differentially regulated upon CSP stimulation (18,23) and have categorized these genes into  
369 two main categories - early genes regulated by ComE or late genes regulated by the  
370 alternative sigma factor, ComX. In their study, *briC* was found to be upregulated in a pattern  
371 consistent with early genes. However, the upregulation was not found to be statistically  
372 significant, and this study is the first validation of *briC* as a competence-regulated peptide.

373 We have provided evidence that *briC* stimulates biofilm development on abiotic surfaces  
374 and promotes nasopharyngeal colonization in a murine model. These findings are consistent  
375 with studies that show that pneumococcal biofilms contribute to colonization. Colonization of  
376 the upper respiratory tract is a requisite for pneumococcal dissemination to distant anatomical  
377 sites and subsequent disease (10). These sessile communities serve as a source of  
378 pneumococcal cells with an activated virulence-associated transcription program. That is,  
379 when compared to cells originating from a planktonic mode of growth, those originating from a  
380 biofilm mode of growth are more likely to cause disease upon infecting other tissues (11). In  
381 this manner, increased biofilm development likely heightens the risk for disease. Biofilms and

382 competence are also associated with transformation efficiency. We have observed a mild but  
383 significant decrease in the transformation efficiency of *briC*-deletion mutants relative to WT  
384 R6D cells (**Fig. S1**). Finally, colonization of the upper respiratory tract is also a reservoir for  
385 pneumococcal transmission. Transmission occurs when cells migrate from the nasopharynx of  
386 one host to that of another. Thus, BriC's contribution to colonization may influence both  
387 disease severity and transmission.

388 While it has been established that CSP contributes to biofilm development, the  
389 competence-dependent genes that regulate biofilm development are not well understood  
390 (7,12). Our finding that increased levels of *briC* can fully rescue biofilm defects from a *comE*  
391 deletion mutant *in vitro*, and partially rescue its colonization defects *in vivo* suggests that *briC*  
392 expression may bypass the requirement for competence in biofilm development. ComE is a  
393 key regulator of competence whose activity is required to regulate approximately 5-10% of the  
394 genome, and as such deletion of *comE* is expected to have substantial global consequences  
395 (18,23). In this context, it is noteworthy that overexpression of one gene (*briC*) in the *comE*-  
396 deletion mutant was able to improve colonization in the murine model. These findings strongly  
397 suggested that BriC is a molecular link between competence, biofilm development, and  
398 colonization.

399 Our data suggests that many strains have multiple inputs to the regulation of *briC*.  
400 Shared across all strains is the regulation by ComE, the key regulator of the competence  
401 pathway. Competence is responsive to environmental cues, such as changes in cell density,  
402 pH, mutational burden in cells, and exposure to antibiotics (16,51–53). Conversely,  
403 competence is inhibited by the degradation of CSP via the activity of the CiaHR TCS and the  
404 serine protease, HtrA (54,55). Factors altering competence will also alter *briC* levels due to its  
405 competence-dependent induction. Our comparative genomics suggest that a subset of  
406 pneumococcal lineages may encode an additional *briC*-regulatory element. Specifically, the

407 *briC* promoter differs across strains, in that a subset of lineages encodes a long promoter with  
408 a RUP sequence ( $P_{briC_{long}}$ ) and has higher basal levels of *briC* expression. This long promoter  
409 is constitutively active, even when competence is off.

410 The long promoter is encoded in the vast majority of strains from the PMEN1 lineage  
411 (Spanish-USA) and the PMEN14 (Taiwan-19F) lineages. These lineages are prominent in the  
412 clinical setting; they are multi-drug resistant and pandemic (56–58). This additional  
413 competence-independent regulation of the long promoter may provide promoter-binding sites  
414 for additional regulators or reflects consequences of positional differences for the existing  
415 promoter binding sites. Our biofilm and colonization experiments suggest that encoding the  
416 long *briC* promoter has functional consequences. We conclude that the response of *briC* to  
417 competence is ubiquitous, but that additional lineage-specific factors influence *briC* regulation  
418 and downstream phenotypic consequences.

419 We propose a model where *briC* encodes a signaling molecule with a role in biofilm  
420 development and colonization. First, the transcription of *briC* is induced by ComE through  
421 competence signal transduction pathway in all lineages, and possibly by additional regulator(s)  
422 in a subset of lineages. Once this Gly-Gly peptide is produced, we propose that it is exported  
423 through ABC transporters, a process in which ComAB plays a prominent role. Based on a  
424 bioinformatic comparison with other Gly-Gly peptides we suggest that BriC is cleaved into its  
425 active form (BRIC) during export. It is tempting to speculate that BRIC is a new member of the  
426 expanding set of pneumococcal secreted peptides that signal to neighboring cells promoting  
427 population-level behaviors. In this era of emerging antibiotic resistance, it is imperative that we  
428 test the potential of alternative strategies to inhibit bacterial carriage and disease. One such  
429 strategy is to specifically target bacterial communities and population-level behaviors. In that  
430 regard, molecules such as BriC present promising alternatives to be used as targets for  
431 discovery of novel drugs and therapeutic interventions.

432

## 433 **Materials & Methods**

### 434 **Bacterial strains & growth conditions**

435 Three wild-type (WT) *Streptococcus pneumoniae* strains were used for this  
436 experimental work. The majority of studies were performed on a penicillin-resistant derivative  
437 of R6 (R6D); this strain was generated from a cross where parental strain R6 was recombined  
438 with Hungary19A and the recombinant was selected for penicillin resistance (59). The *briC*  
439 allele in R6D is identical to the allele present in the parental R6. This laboratory strain is non-  
440 encapsulated and does not colonize mice, thus mice colonization experiments were performed  
441 with the serotype 2 D39 strains (GenBank CP000410)(60). The D39 strain contains the same  
442 *briC* allele as is present in the R6D strain, which has been used for most of the work in this  
443 study. Finally, for a representative of PMEN1, we used the carriage isolate, PN4595-T23  
444 (GenBank ABXO01) graciously provided by Drs. Alexander Tomasz and Herminia deLancastre  
445 (61).

446 Colonies were grown from frozen stocks by streaking on TSA-II agar plates  
447 supplemented with 5% sheep blood (BD BBL, New Jersey, USA). Colonies were then used to  
448 inoculate fresh Columbia broth (Remel Microbiology Products, Thermo Fisher Scientific, USA)  
449 and incubated at 37°C and 5% CO<sub>2</sub> without shaking. When noted, colonies were inoculated  
450 into acidic Columbia broth prepared by adjusting the pH of Columbia broth to 6.6 using 1M  
451 HCl. Acidic pH was used to inhibit the endogenous activation of competence.

452

### 453 **Construction of mutants**

454 The mutant strains (R6D $\Delta$ *briC* and PN4595 $\Delta$ *briC*) were constructed by using site-  
455 directed homologous recombination to replace the region of interest with erythromycin-  
456 resistance gene (*ermB*) or kanamycin-resistance gene (*kan*), respectively (**Table S4**). *Kan* and

457 spectinomycin-resistance gene (*aad9*) were used to construct  $\Delta comE$  strains in R6D and  
458 PN4595-T23 respectively. Briefly, the transformation construct was generated by assembling  
459 the amplified flanking regions and antibiotic resistance cassettes. ~2kb of flanking regions  
460 upstream and downstream of the gene of interest was amplified from parental strains by PCR  
461 using Q5 2x Master Mix (New England Biolabs, USA). The antibiotic resistance genes, *kan*  
462 and *aad9* were amplified from *kan-rpsL* Janus Cassette and pR412, respectively (provided by  
463 Dr. Donald A. Morrison), and *ermB* was amplified from *S. pneumoniae* SV35-T23. SV35-T23 is  
464 resistant to erythromycin because of the insertion of a mobile element containing *ermB* (61).  
465 These PCR fragments were then assembled together by sticky-end ligation of restriction  
466 enzyme-cut PCR products. The deletion mutant in R6D is an overexpressor of the downstream  
467 peptide (*spr\_0389*).

468 The *briC* complemented and overexpressor strains were generated using constructs  
469 containing the CDS of *briC* along with either its entire native promoter region or overexpressing  
470 promoter respectively, ligated at its 3' end with a kanamycin resistance cassette. The  
471 promoters used to overexpress *briC* included either the constitutive *amiA* promoter, or  
472 *PbriC<sub>long</sub>*. These were assembled with the amplified flanking regions by Gibson Assembly  
473 using NEBuilder HiFi DNA Assembly Cloning Kit. The construct was introduced in the genome  
474 of R6D downstream of the *bga* region (without modifying *bga*), a commonly employed site (62).  
475 Primers used to generate the constructs are listed in **Table S5**. Like R6D $\Delta briC$ ,  
476 R6D $\Delta briC::briC$  is also an overexpressor of the downstream peptide (*spr\_0389*), which is  
477 annotated as a pseudogene in strains R6D, R6 and D39 (**Fig. 2A**). The expression of  
478 *spr\_0389* remains unchanged in the mutant and the complement (data not shown from qRT-  
479 PCR).

480 The R6D $\Delta comE::PbriC<sub>long</sub>-briC$  strain was constructed by replacing *comE* with  
481 spectinomycin resistant cassette in the R6D *PbriC<sub>long</sub>-briC* strain. *comAB*-deletion mutant in a



482 *briC* overexpressor R6D genomic background strain (R6D $\Delta$ *comAB*::*PbriC*<sub>long</sub>-*briC*) was  
483 constructed by transforming the R6D::*PbriC*<sub>long</sub>-*briC* strain with the genomic DNA of ADP226.  
484 ADP226 is a strain from the D39 genomic background with *comAB* replaced by erythromycin  
485 resistance cassette. To make the construct, the flanking regions and erythromycin  
486 resistance cassette were amplified, and then assembled together by sticky-end ligation of  
487 restriction enzyme-cut PCR products. The construct was then transformed into D39 ADP225  
488 (unpublished) and selected on Columbia blood agar supplemented with  
489 0.25  $\mu\text{g mL}^{-1}$  erythromycin.

490 The *briC* promoter region was modified by shuffling the ComE-binding box  
491 (R6D $\Delta$ *briC*::*PbriC*<sub>Shuffled ComE-box</sub>-*briC*). The ComE-binding box was shuffled using PCR by  
492 amplifying from R6D $\Delta$ *briC*::*briC* and introducing the shuffled sequence  
493 (CAGACCAGTTAGTCTAGGATAGAGCTTAAG) into the primers. The resulting amplicons  
494 were assembled using Gibson Assembly. The modified construct was transformed into  
495 R6D $\Delta$ *briC* strain in the region downstream of the *bgaA* gene.

496 The D39 *briC* deletion mutant (D39 $\Delta$ *briC*), *briC* complemented (D39 $\Delta$ *briC*::*briC*), *comE*  
497 deletion mutant (D39 $\Delta$ *comE*), *briC* overexpressor in *comE* deletion background  
498 (D39 $\Delta$ *comE*::*PbriC*<sub>long</sub>-*briC*), and *briC* expressed from a promoter with a shuffled ComE-  
499 binding box (R6D $\Delta$ *briC*::*PbriC*<sub>Shuffled ComE-box</sub>-*briC*) strains were generated by transformation  
500 with the corresponding constructs amplified from R6D into strain D39.

501

## 502 **Construction of *lacZ* fusions**

503 Chromosomal transcriptional *lacZ*-fusions to the target promoters were generated to  
504 assay promoter activity. These *lacZ*-fusions were generated via double crossover homologous  
505 recombination event in the *bgaA* gene using modified integration plasmid pPP2. pPP2 was



506 modified by introducing *kan* in the multiple cloning site, in a direction opposite to *lacZ*. The  
507 modified pPP2 was transformed into *E. coli* TOP10. The putative *briC* promoter regions were  
508 amplified from R6 and PN4595-T23 strains, and modified to contain KpnI and XbaI restriction  
509 sites, which were then assembled in the modified pPP2 plasmid by sticky-end ligation of the  
510 enzyme digested products. These plasmids were transformed into *E. coli* TOP10 strain, and  
511 selected on LB (Miller's modification, Alfa Aesar, USA) plates, supplemented with ampicillin  
512 (100µg/ml). These plasmids were then purified by using E.Z.N.A. Plasmid DNA Mini Kit II  
513 (OMEGA bio-tek, USA), and transformed into pneumococcal strains R6 and PN4595-T23 and  
514 selected on Columbia agar plates supplemented with kanamycin (150µg/ml).

515

#### 516 **Bacterial transformations**

517 For all bacterial transformations to generate mutants, target strains (R6D or D39) were  
518 grown in acidic Columbia broth, and 1µg of transforming DNA along with 125µg/mL of CSP1  
519 (sequence: EMRLSKFFRDFILQRKK; purchased from GenScript, NJ, USA) was added to them  
520 when the cultures reached an OD<sub>600</sub> of 0.05, followed by incubation at 37°C. After 2 hours, the  
521 treated cultures were plated on Columbia agar plates containing the appropriate antibiotic;  
522 erythromycin (2µg/ml), or kanamycin (150µg/ml). Resistant colonies were cultured in selective  
523 media, and the colonies confirmed using PCR. Bacterial strains generated in this study are  
524 listed in **Table S4**.

525 For transformation efficiency experiments, R6D strain was grown in acidic Columbia  
526 broth until it reached an OD<sub>600</sub> of 0.05. At this point, number of viable cells was counted by  
527 plating serial dilutions on TSA-blood agar plates. Transformations were carried out by adding  
528 either 100ng or 500ng of transforming DNA in the media supplemented with 125µg/mL of  
529 CSP1 and incubated at 37°C for 30mins. For transforming DNA, we used either genomic DNA  
530 or PCR products. The donor DNA contained spectinomycin-resistance gene (*aad9*) in the inert

531 genomic region between *spr\_0515* and *spr\_0516*. This construct was generated in PN4595-  
532 T23, spec<sup>R</sup>, followed by its amplification and transformation into R6D and Taiwan-19F strains  
533 (Sp3063-00). The genomic DNA was extracted from Taiwan-19F, spec<sup>R</sup> strain. The purified  
534 linear DNA was an amplicon of the region from R6D. After 30 minutes, the cultures were  
535 plated on Columbia agar plates containing spectinomycin (100µg/ml), incubated overnight, and  
536 colonies were counted the next day.

537

### 538 **RNA extraction**

539 RNA extraction consists of sample collection, pneumococcal cell lysis, and purification  
540 of RNA. For qRT-PCR analysis, the strains (R6D and R6D $\Delta$ *comE*) were grown to an OD<sub>600</sub> of  
541 0.3 in acidic Columbia broth, followed by CSP1 treatment for 0, 10, or 15 minutes. For *in vitro*  
542 transcriptomic analysis using NanoString Technology, the R6D strain was grown to an OD<sub>600</sub>  
543 of 0.1 in Columbia broth (in one experimental set, the samples were grown in sub-lethal  
544 concentration of penicillin (0.8µg/ml) for an hour). RNA was collected in RNALater (Thermo  
545 Fisher Scientific, USA) to preserve RNA quality and pelleted. For the *in vivo* experiments, the  
546 RNA was extracted from middle-ear chinchilla effusions infected with PN4595-T23 and  
547 PN4595-T23 $\Delta$ *comE* strains, and preserved by flash freezing the effusion. In all the samples,  
548 the pneumococcal cell lysis was performed by re-suspending the cell pellet in an enzyme  
549 cocktail (2mg/ml proteinase K, 10mg/ml lysozyme, and 20µg/ml mutanolysin), followed by  
550 bead beating with glass beads (0.5mm Zirconia/Silica) in FastPrep-24 Instrument (MP  
551 Biomedicals, USA). Finally, RNA was isolated using the RNeasy kit (Genesee Scientific, USA)  
552 following manufacturer's instructions. For analysis with the NanoString, which does not require  
553 pure DNA, the output from the RNeasy kit was loaded on the machine without further  
554 processing. For analysis using qRT-PCR, contaminant DNA was removed by treating with  
555 DNase (2U/µL) at 37°C for at least 45 mins. The RNA concentration was measured by

556 NanoDrop 2000c spectrophotometer (Thermo Fisher Scientific, USA) and its integrity was  
557 confirmed on gel electrophoresis. The purity of the RNA samples was confirmed by the  
558 absence of a DNA band on an agarose gel obtained upon running the PCR products for the  
559 samples amplified for *gapdh*.

560

### 561 **NanoString Technology for transcriptional analysis**

562 nCounter Analysis System from NanoString Technology provides a highly sensitive  
563 platform to measure gene expression both *in vitro* and *in vivo*, as previously described (63).  
564 Probes used in this study were custom-designed by NanoString Technology, and included  
565 housekeeping genes *gyrB* and *metG*, which were used as normalization controls. 5 $\mu$ L of  
566 extracted RNA samples were hybridized onto the nCounter chip following manufacturer's  
567 instructions. RNA concentration ranged from 80-200ng/ $\mu$ L for *in vivo* samples, and between  
568 60-70ng total RNA for *in vitro* samples. A freely available software from manufacturers,  
569 nSolver, was used for quality assessment of the data, and normalization. The RNA counts  
570 were normalized against the geometric mean of *gyrB* and *metG* (64,65). The 16S rRNA gene  
571 is not optimal for normalization in the NanoString, as the high abundance of this transcript  
572 packs the field of view. Pearson's Correlation Coefficient was used to estimate correlation in  
573 the expression levels of different genes.

574

### 575 **qRT-PCR for transcriptional analysis**

576 High quality RNA was used as a template for first-strand cDNA synthesis SuperScript  
577 VILO synthesis kit (Invitrogen). The resulting product was then directly used for qRT-PCR  
578 using PerfeCTa SYBR Green SuperMix (Quantabio, USA) in an Applied Biosystems 7300  
579 Instrument (Applied Biosystems, USA). 16S rRNA counts were used for normalization. The raw  
580 data was then run through LinregPCR for expression data analysis, where the output

581 expression data is displayed in arbitrary fluorescence units ( $N_0$ ) that represent the starting  
582 RNA amount for the test gene in that sample (66,67). Fold-change relative to WT was then  
583 calculated for each individual experiment.

584

### 585 **$\beta$ -galactosidase assay**

586  $\beta$ -galactosidase assays were performed as previously described (68) using cells that  
587 were grown in acidic Columbia broth to exponential phase. Cells were either left untreated, or  
588 independently treated with CSP1 (EMRLSKFFRDFILQRKK) or CSP2 (EMRISRILDFLFLRKK)  
589 (Genscript, USA) for 30 minutes and processed for analysis.

590

### 591 **Biofilm formation assay**

592 Pneumococcal cultures grown in Columbia broth were used to seed biofilms on abiotic  
593 surfaces. When the cultures reached an  $OD_{600}$  of 0.05, each bacterial strain was seeded on  
594 35MM glass bottom culture dishes (MatTek Corporation, USA). To promote biofilm growth, the  
595 plates were incubated at 37°C and 5%  $CO_2$ . Every 24 hours, the supernatant was carefully  
596 aspirated, followed by addition of the same volume of pre-warmed Columbia broth at one-fifth  
597 concentration. The biofilm samples were fixed at two time-points: 24 and 72 hrs. For fixing, the  
598 supernatants were carefully aspirated, and biofilms were washed thrice with PBS to remove  
599 non-adherent and/or weakly adherent bacteria. Subsequently, biofilms were fixed with 4% PFA  
600 (Electron Microscopy Sciences), washed three times with PBS, and prepared for confocal  
601 microscopy.

602

### 603 **Confocal microscopy & quantification of biofilms**

604 Fixed biofilms were stained with SYTO59 Nucleic Acid Stain (Life Technologies, USA)  
605 for 30 minutes, washed three times, and preserved in PBS buffer for imaging. Confocal

606 microscopy was performed on the stage of Carl Zeiss LSM-880 META FCS, using 561nm  
607 laser line for SYTO59 dye. Stack were captured every 0.46  $\mu\text{m}$ , imaged from the bottom to the  
608 top of the stack until cells were visible, and reconstructed in Carl Zeiss black edition and  
609 ImageJ. The different biofilm parameters (biomass, maximum thickness, and average  
610 thickness over biomass) were quantified using COMSTAT2 plug-in available for ImageJ (69).  
611 For depiction of representative reconstructed Z-stacks, empty slices were added to the images  
612 so the total number of slices across all the samples were the same. These reconstructed  
613 stacks were pseudo-colored according to depth using Carl Zeiss black edition. The color levels  
614 of the images being used for representation purposes were adjusted using GNU Image  
615 Manipulation Program (GIMP).

616

#### 617 **Testing peptide secretion using the Nano-Glo HiBiT extracellular detection system**

618 HiBiT constructs were designed by fusing the C-terminus of the region of interest with  
619 the 11-amino acid HiBiT peptide using a 10-amino acid linker. The region of interest was the  
620 putative secretion signal (until the double glycine) of the *briC* gene. The expression of these  
621 constructs was designed to be controlled by the *briC* promoter region. The construct was  
622 introduced in the genome of R6D and R6D $\Delta$ *comAB* strains downstream of the *bgaA* gene  
623 (without modifying *bgaA*).

624 R6D strains containing HiBiT constructs were started from overnight blood agar plates  
625 into acidic Columbia broth (pH 6.6) and incubated at 37°C and 5% CO<sub>2</sub> without shaking.  
626 Cultures were grown to an OD<sub>600</sub> of ~0.2. Cultures were either left untreated or treated with  
627 125 $\mu\text{g}/\text{mL}$  of CSP1 for 30 minutes, followed by measuring optical density at 600nm. Cells were  
628 pelleted by centrifuging the cultures for 5 minutes at 3700 $\times$ g. The resulting supernatants were  
629 removed and filtered through 0.2 $\mu\text{m}$  syringe filters. The cell pellets were resuspended in  
630 equal volume of PBS. To obtain cell lysate, triton X-100 was added to 1ml of the

631 resuspended cells to a final concentration of 1%. Additionally, to minimize non-specific  
632 binding, triton X-100 was also added to 1ml of the filtered supernatant to a final  
633 concentration of 1%. 75µl of the supernatant, whole cells, lysates, were added to a Costar96  
634 well flat white tissue culture treated plates and mixed with an equal volume of the Nano-Glo  
635 Extracellular Detection System reagent as specified in the manufacturer's instructions.  
636 Additionally, media and PBS samples were used as controls. Reactions were incubated at  
637 room temperature for 10 minutes followed by measuring luminescence on a Tecan Spark with  
638 an integration time of 2000 milliseconds.

639

#### 640 ***In vivo* transcriptomic analysis using chinchilla OM model**

641 All chinchilla experiments were conducted with the approval of Allegheny-Singer  
642 Research Institute (ASRI) Institutional Animal Care and Use Committee (IACUC) A3693-  
643 01/1000. Research grade young adult chinchillas (*Chinchilla lanigera*) weighing 400-600g were  
644 acquired from R and R Chinchilla Inc., Ohio. Chinchillas were maintained in BSL2 facilities and  
645 experiments were done under subcutaneously injected ketamine-xylazine anesthesia  
646 (1.7mg/kg animal weight for each). Chinchillas were infected with 100 CFUs in 100µL of *S.*  
647 *pneumoniae* PN4595-T23 by transbullar inoculation within each middle ear. For RNA  
648 extraction, chinchillas were euthanized 48h post-inoculation of pneumococcus, and a small  
649 opening was generated through the bulla to access the middle ear cavity. Effusions were  
650 siphoned out from the middle ear and flash frozen in liquid nitrogen to preserve the bacterial  
651 RNA. Animals were euthanized by administering an intra-cardiac injection of 1mL potassium  
652 chloride after regular sedation.

653

#### 654 **Murine colonization model**

655 The role of *briC* in experimental pneumococcal colonization was assessed as previously  
656 described (70,71). For this, 10 weeks old female CD1 mice (Charles River), weighing  
657 approximately 30-35 g were anesthetized with 2.5% isoflurane over oxygen (1.5 to 2 liter/min),  
658 and administered intranasally with approximately  $1 \times 10^5$  CFU/mouse in 20 $\mu$ l PBS. At  
659 predetermined time intervals, a group of 5 mice were euthanized by cervical dislocation, and  
660 the nasopharyngeal lavage of each animal was obtained using 500 $\mu$ l PBS. The pneumococci  
661 in nasopharyngeal wash were enumerated by plating the serial dilutions onto blood agar  
662 plates.

663

#### 664 **Statistical tests**

665 The statistical differences among different groups were calculated by performing  
666 ANOVA followed by Tukey's post-test, unless stated otherwise. p-values of less than 0.05  
667 were considered to be statistically significant.

668

#### 669 **Distribution of *briC* across streptococcal strains**

670 To identify *briC* homologs we used tBLASTn with default parameters on the RAST  
671 database to search the genome sequences of all fifty-five strains. Predicted protein sequences  
672 were downloaded as well as nucleotide sequences for the *briC* homolog and 1500-bp flanking  
673 regions surrounding the *briC* homolog. Predicted protein sequences for BriC were aligned  
674 using NCBI Cobalt (72) and visualized using Jalview (73). One sequences (CDC3059-06)  
675 appeared to have a frame-shift after a string of guanines. Given that sequencing technologies  
676 are often inaccurate after a string of identical bases, we curated this sequence in the dataset.  
677 The sequences were translated in Jalview, and organized based on polymorphisms in the  
678 translated sequences.



679 The *briC* alleles were then organized in the context of the species tree. For this we used  
680 a published phylogenetic tree (34,38). As previously described, the whole genome sequence  
681 (WGS) for these strains were aligned using MAUVE (74,75), the core region was extracted and  
682 aligned using MAFFT (FFT-NS-2) (76). Model selection was performed using MODELTEST  
683 (77), and the phylogenetic tree was built with PhyML 3.0 (78), model GTR+I(0.63) using  
684 maximum likelihood and 100 bootstrap replicates. On the visualization, each allelic type is  
685 shape-coded, and the visualization was generated using the Interactive Tree of Life (iTOL)  
686 (79).

687 Next, we expanded the search to a set of 4,034 genomes. These correspond to the  
688 genomes within pubMLST, with at least 2Mb of genomic data (Genome IDs are listed in **Table**  
689 **S6**). We used BLASTn to search for genomes that encode sequences that are at least 70%  
690 identical over 70% of their length to *briC* alleles 1A or 1B. The 3,976 hits were organized to  
691 parse out and enumerate the unique sequences using Python. Next, the hits were visualized  
692 and further annotated using Jalview (73). As in the smaller genomic set, one allele  
693 representative appeared to have a frame-shift after a string of guanines and was curated in the  
694 dataset. Next the DNA sequences were translated, and the predicted protein sequences were  
695 organized to display the unique alleles. The resulting 19 coding sequence were colored in  
696 Jalview based on percent identity to highlight the variability (**Fig. 2B**). To search for *briC* in  
697 related species, we performed a BLASTp analysis in NCBI. We used alleles 1A and 1B as  
698 query sequences, default parameters, and the non-redundant database excluding  
699 *Streptococcus pneumoniae* (taxid: 1313).

700

### 701 **Analysis of *briC* promoter region**

702 In order to examine the structure of the promoter region upstream of the *briC* gene, a  
703 1500-bp flanking region on both sides of the *briC* gene was pulled from the RAST database



704 (80). Sequences were aligned using Kalign (81) and then visualized with Jalview (73). The  
705 alignment revealed two clear groups within the dataset: those with the RUP insertion and those  
706 without. We also noted that CDC1087-00 may have an additional mobile element inserted  
707 within the RUP. However, given that the RUP and this mobile element exist in multiple places  
708 in the genome, we cannot determine whether this is real or an artifact of assembly without the  
709 isolate. Thus, we opted not to use the promoter sequence for the consensus in Figure 2A, and  
710 we did not mark this genome as having a long promoter in Figure 4A. We marked the species  
711 tree with allelic variants that contain the RUP insertion. We observed that RUP was present in  
712 the representative isolates from two clinically important lineages PMEN1 and PMEN14. To  
713 check the distribution of the long promoter in a larger set strains, we used PubMLST (39) to  
714 inspect 4,034 sequences with complete genomes. The sequence IDs for these 4,034  
715 sequences are listed in **Table S6**. This set includes 198 ST81 (PMEN1), as well as 104 ST236  
716 (PMEN14) and 15 ST320 (PMEN14) strains. For analysis of the ComE-binding box, the ComE  
717 consensus sequence was extracted from the promoter regions of the pneumococcal strains  
718 and aligned with Jalview. The logo was generated using WebLogo (82).

719

## 720 **Ethics statement**

721 Mouse experiments were performed at the University of Leicester under appropriate  
722 project (permit no. P7B01C07A) and personal licenses according to the United Kingdom Home  
723 Office guidelines under the Animals Scientific Procedures Act 1986, and the University of  
724 Leicester ethics committee approval. The protocol was agreed by both the U.K. Home Office  
725 and the University of Leicester ethics committee. Where specified, the procedures were carried  
726 out under anesthetic with isoflurane. Animals were housed in individually ventilated cages in a  
727 controlled environment, and were frequently monitored after infection to minimize suffering.  
728 Chinchilla experiments were performed at the Allegheny-Singer Research Institute (ASRI)

729 under the Institutional Animal Care and Use Committee (IACUC) permit A3693-01/1000.  
730 Chinchillas were maintained in BSL2 facilities, and all experiments with chinchillas were done  
731 under subcutaneously injected ketamine-xylazine anesthesia (1.7mg/kg animal weight for  
732 each). All chinchillas were maintained in accordance with the applicable portions of the Animal  
733 Welfare Act, and the guidelines published in the DHHS publication, Guide for the Care and  
734 Use of Laboratory Animals.

735

### 736 **Acknowledgements**

737 We thank Drs. Alexander Tomasz and Herminia deLancastre for the PMEN1 strain PN4595-  
738 T23 and the R6D strain used in this study. We would also like to thank Dr. Donald A. Morrison  
739 for *kan-rpsL* Janus cassette and the plasmid pR412. We thank Anagha Kadam for help on  
740 data analysis, Rolando A. Cuevas for help analyzing biofilm images, and Emilio I. Rodriguez  
741 for his support with experiments. We truly appreciate the insight provided by Dr. Suzanne  
742 Dawid and Charles Wang regarding the HiBiT assay to test the role of ComAB in BriC export.

743

### 744 **Supplementary Result**

#### 745 **Examining the role of *briC* in transformation**

746 One of the main phenotypic consequences of the competence pathway is  
747 transformation. Since ComE regulates the expression of *briC*, we investigated whether *briC*  
748 plays a role in regulating transformation efficiency. To this end, we added different amounts  
749 (100ng or 500ng) of exogenous DNA (genomic or amplified linear fragments) to pneumococcal  
750 cells. We found a minor decrease in the transformation efficiency of the *briC*-deletion mutant  
751 cells (R6D $\Delta$ *briC*) relative to the WT cells (**Fig. S1**). A strain with complemented *briC*  
752 (R6D $\Delta$ *briC*::*briC*) exhibited a partial restoration of this defect. A strain with overexpression of  
753 *briC* (R6D $\Delta$ *briC*::*briC*-OE) displayed a greater restoration of the transformation efficiency, as

754 compared to R6DΔ*briC*::*briC* cells, but not a full rescue (**Fig. S1B**). These results suggest that  
755 *briC* may play a role in regulating transformation efficiency.

756

### 757 **Supplementary Tables**

758 Table S1: Strains used in genomic comparisons and phylogenetic tree.

759 Table S2: CSP phenotypes and *briC* alleles for pneumococcal genomes in figure 4A.

760 Table S3: HiBiT assay measuring bioluminescence of the construct containing BriC leader  
761 fused with HiBiT, both in the absence and presence of CSP in supernatants, whole cell  
762 surfaces and lysates.

763

764 Table S4: Strains used in this experimental work.

765 Table S5: Primers used in this study.

766 Table S6: List of the 4,034 isolates used in this study. These numbers correspond to isolate  
767 IDs of strains in pubMLST.

768

### 769 **Supplementary Files**

770 File S1: Representative *briC* alleles from *Streptococcus* sp.

771 File S2: Representative sequences of the short and long *briC* promoter regions with the RUP

772 highlighted in bold.

773

## 774 References

- 775 1. Hall-Stoodley L, Costerton JW, Stoodley P. Bacterial biofilms: from the Natural  
776 environment to infectious diseases. *Nat Rev Microbiol*. 2004 Feb;2(2):95–108.
- 777 2. Shanker E, Federle MJ. Quorum Sensing Regulation of Competence and Bacteriocins  
778 in *Streptococcus pneumoniae* and mutants. *Genes* [Internet]. 2017 Jan 5 [cited 2017  
779 May 18];8(1). Available from: <http://www.ncbi.nlm.nih.gov/pmc/articles/PMC5295010/>
- 780 3. Blanchette-Cain K, Hinojosa CA, Akula Suresh Babu R, Lizcano A, Gonzalez-Juarbe N,  
781 Munoz-Almagro C, et al. *Streptococcus pneumoniae* biofilm formation is strain  
782 dependent, multifactorial, and associated with reduced invasiveness and  
783 immunoreactivity during colonization. *mBio*. 2013;4(5):e00745-713.
- 784 4. Hall-Stoodley L, Hu FZ, Gieseke A, Nistico L, Nguyen D, Hayes J, et al. Direct Detection  
785 of Bacterial Biofilms on the Middle-Ear Mucosa of Children With Chronic Otitis Media.  
786 *JAMA J Am Med Assoc*. 2006 Jul 12;296(2):202–11.
- 787 5. Hoa M, Syamal M, Sachdeva L, Berk R, Coticchia J. Demonstration of nasopharyngeal  
788 and middle ear mucosal biofilms in an animal model of acute otitis media. *Ann Otol*  
789 *Rhinol Laryngol*. 2009 Apr;118(4):292–8.
- 790 6. Marks LR, Parameswaran GI, Hakansson AP. Pneumococcal interactions with epithelial  
791 cells are crucial for optimal biofilm formation and colonization in vitro and in vivo. *Infect*  
792 *Immun*. 2012 Aug;80(8):2744–60.
- 793 7. Oggioni MR, Trappetti C, Kadioglu A, Cassone M, Iannelli F, Ricci S, et al. Switch from  
794 planktonic to sessile life: a major event in pneumococcal pathogenesis. *Mol Microbiol*.  
795 2006 Sep;61(5):1196–210.
- 796 8. Sanderson AR, Leid JG, Hunsaker D. Bacterial biofilms on the sinus mucosa of human  
797 subjects with chronic rhinosinusitis. *The Laryngoscope*. 2006 Jul;116(7):1121–6.
- 798 9. Chao Y, Marks LR, Pettigrew MM, Hakansson AP. *Streptococcus pneumoniae* biofilm  
799 formation and dispersion during colonization and disease. *Front Cell Infect Microbiol*  
800 [Internet]. 2015 Jan 13 [cited 2016 Sep 15];4. Available from:  
801 <http://www.ncbi.nlm.nih.gov/pmc/articles/PMC4292784/>
- 802 10. Bogaert D, de Groot R, Hermans P. *Streptococcus pneumoniae* colonisation: the key to  
803 pneumococcal disease. *Lancet Infect Dis*. 2004 Mar;4(3):144–54.
- 804 11. Marks LR, Davidson BA, Knight PR, Hakansson AP. Interkingdom signaling induces  
805 *Streptococcus pneumoniae* biofilm dispersion and transition from asymptomatic  
806 colonization to disease. *mBio*. 2013;4(4).
- 807 12. Trappetti C, Gualdi L, Meola LD, Jain P, Korir CC, Edmonds P, et al. The impact of the  
808 competence quorum sensing system on *Streptococcus pneumoniae* biofilms varies  
809 depending on the experimental model. *BMC Microbiol*. 2011 Apr 14;11(1):75.

- 810 13. Trappetti C, Potter AJ, Paton AW, Oggioni MR, Paton JC. LuxS Mediates Iron-  
811 Dependent Biofilm Formation, Competence, and Fratricide in *Streptococcus*  
812 *pneumoniae* [7]. *Infect Immun*. 2011 Nov;79(11):4550–8.
- 813 14. Vidal JE, Howery KE, Ludewick HP, Nava P, Klugman KP. Quorum-sensing systems  
814 LuxS/autoinducer 2 and Com regulate *Streptococcus pneumoniae* biofilms in a  
815 bioreactor with living cultures of human respiratory cells. *Infect Immun*. 2013  
816 Apr;81(4):1341–53.
- 817 15. Vidal JE, Ludewick HP, Kunkel RM, Zähler D, Klugman KP. The LuxS-Dependent  
818 Quorum-Sensing System Regulates Early Biofilm Formation by *Streptococcus*  
819 *pneumoniae* Strain D39 [7]. *Infect Immun*. 2011 Oct;79(10):4050–60.
- 820 16. Claverys J-P, Prudhomme M, Martin B. Induction of Competence Regulons as a  
821 General Response to Stress in Gram-Positive Bacteria. *Annu Rev Microbiol*.  
822 2006;60(1):451–75.
- 823 17. Claverys J-P, Martin B, Håvarstein LS. Competence-induced fratricide in streptococci.  
824 *Mol Microbiol*. 2007 Jun;64(6):1423–33.
- 825 18. Dagkessamanskaia A, Moscoso M, Hénard V, Guiral S, Overweg K, Reuter M, et al.  
826 Interconnection of competence, stress and CiaR regulons in *Streptococcus*  
827 *pneumoniae*: competence triggers stationary phase autolysis of *ciaR* mutant cells. *Mol*  
828 *Microbiol*. 2004 Feb;51(4):1071–86.
- 829 19. Guiral S, Mitchell TJ, Martin B, Claverys J-P. Competence-programmed predation of  
830 noncompetent cells in the human pathogen *Streptococcus pneumoniae*: genetic  
831 requirements. *Proc Natl Acad Sci U S A*. 2005 Jun 14;102(24):8710–5.
- 832 20. Havarstein LS, Coomaraswamy G, Morrison DA. An unmodified heptadecapeptide  
833 pheromone induces competence for genetic transformation in *Streptococcus*  
834 *pneumoniae*. *Proc Natl Acad Sci U S A*. 1995 Nov 21;92(24):11140–4.
- 835 21. Kowalko JE, Sebert ME. The *Streptococcus pneumoniae* competence regulatory  
836 system influences respiratory tract colonization. *Infect Immun*. 2008 Jul;76(7):3131–40.
- 837 22. Marx P, Nuhn M, Kovács M, Hakenbeck R, Brückner R. Identification of genes for small  
838 non-coding RNAs that belong to the regulon of the two-component regulatory system  
839 CiaRH in *Streptococcus*. *BMC Genomics*. 2010 Nov 24;11:661.
- 840 23. Peterson SN, Sung CK, Cline R, Desai BV, Snesrud EC, Luo P, et al. Identification of  
841 competence pheromone responsive genes in *Streptococcus pneumoniae* by use of  
842 DNA microarrays. *Mol Microbiol*. 2004 Feb;51(4):1051–70.
- 843 24. Steinmoen H, Knutsen E, Håvarstein LS. Induction of natural competence in  
844 *Streptococcus pneumoniae* triggers lysis and DNA release from a subfraction of the cell  
845 population. *Proc Natl Acad Sci U S A*. 2002 May 28;99(11):7681–6.
- 846 25. Stevens KE, Chang D, Zwack EE, Sebert ME. Competence in *Streptococcus*  
847 *pneumoniae* Is Regulated by the Rate of Ribosomal Decoding Errors. *mBio*. 2011 Nov  
848 1;2(5):e00071-11.

- 849 26. Tomasz A. Control of the Competent State in Pneumococcus by a Hormone-Like Cell  
850 Product: An Example for a New Type of Regulatory Mechanism in Bacteria. *Nature*.  
851 1965 Oct 9;208(5006):155–9.
- 852 27. Tovpeko Y, Morrison DA. Competence for Genetic Transformation in *Streptococcus*  
853 *pneumoniae*: Mutations in  $\sigma A$  Bypass the comW Requirement. *J Bacteriol*. 2014 Aug  
854 11;JB.01933-14.
- 855 28. Veening J-W, Blokesch M. Interbacterial predation as a strategy for DNA acquisition in  
856 naturally competent bacteria. *Nat Rev Microbiol*. 2017 Oct;15(10):629.
- 857 29. Pestova EV, Håvarstein LS, Morrison DA. Regulation of competence for genetic  
858 transformation in *Streptococcus pneumoniae* by an auto-induced peptide pheromone  
859 and a two-component regulatory system. *Mol Microbiol*. 1996 Aug;21(4):853–62.
- 860 30. Martin B, Granadel C, Campo N, Hénard V, Prudhomme M, Claverys J-P. Expression  
861 and maintenance of ComD-ComE, the two-component signal-transduction system that  
862 controls competence of *Streptococcus pneumoniae*. *Mol Microbiol*. 2010  
863 Mar;75(6):1513–28.
- 864 31. Aprianto R, Slager J, Holsappel S, Veening J-W. Time-resolved dual RNA-seq reveals  
865 extensive rewiring of lung epithelial and pneumococcal transcriptomes during early  
866 infection. *Genome Biol*. 2016 Sep 27;17:198.
- 867 32. Armbruster CE, Hong W, Pang B, Weimer KED, Juneau RA, Turner J, et al. Indirect  
868 Pathogenicity of *Haemophilus influenzae* and *Moraxella catarrhalis* in Polymicrobial  
869 Otitis Media Occurs via Interspecies Quorum Signaling. *mBio*. 2010 Aug  
870 31;1(3):e00102-10.
- 871 33. Marks LR, Reddinger RM, Hakansson AP. High Levels of Genetic Recombination  
872 during Nasopharyngeal Carriage and Biofilm Formation in *Streptococcus pneumoniae*.  
873 *mBio*. 2012 Nov 1;3(5):e00200-12.
- 874 34. Cuevas RA, Eutsey R, Kadam A, West-Roberts JA, Woolford CA, Mitchell AP, et al. A  
875 novel streptococcal cell-cell communication peptide promotes pneumococcal virulence  
876 and biofilm formation. *Mol Microbiol*. 2017 Aug;105(4):554–71.
- 877 35. de Saizieu A, Gardès C, Flint N, Wagner C, Kamber M, Mitchell TJ, et al. Microarray-  
878 based identification of a novel *Streptococcus pneumoniae* regulon controlled by an  
879 autoinduced peptide. *J Bacteriol*. 2000 Sep;182(17):4696–703.
- 880 36. Ween O, Gaustad P, Håvarstein LS. Identification of DNA binding sites for ComE, a key  
881 regulator of natural competence in *Streptococcus pneumoniae*. *Mol Microbiol*. 1999  
882 Aug;33(4):817–27.
- 883 37. Slager J, Aprianto R, Veening J-W. Deep genome annotation of the opportunistic  
884 human pathogen *Streptococcus pneumoniae* D39. *bioRxiv*. 2018 Mar 22;283663.
- 885 38. Kadam A, Eutsey RA, Rosch J, Miao X, Longwell M, Xu W, et al. Promiscuous signaling  
886 by a regulatory system unique to the pandemic PMEN1 pneumococcal lineage. *PLOS*  
887 *Pathog*. 2017 May 18;13(5):e1006339.



- 888 39. Jolley KA, Maiden MC. BIGSdb: Scalable analysis of bacterial genome variation at the  
889 population level. *BMC Bioinformatics*. 2010;11:595.
- 890 40. Ye J, McGinnis S, Madden TL. BLAST: improvements for better sequence analysis.  
891 *Nucleic Acids Res*. 2006 Jul 1;34(Web Server issue):W6-9.
- 892 41. Claverys J-P, Martin B. Competence regulons, genomics and streptococci. *Mol*  
893 *Microbiol*. 1998;29(4):1126–7.
- 894 42. Oggioni MR, Claverys J-P. Repeated extragenic sequences in prokaryotic genomes: a  
895 proposal for the origin and dynamics of the RUP element in *Streptococcus pneumoniae*.  
896 *Microbiology*. 1999;145(10):2647–53.
- 897 43. Kjos M, Miller E, Slager J, Lake FB, Gericke O, Roberts IS, et al. Expression of  
898 *Streptococcus pneumoniae* Bacteriocins Is Induced by Antibiotics via Regulatory  
899 Interplay with the Competence System. *PLOS Pathog*. 2016 Feb 3;12(2):e1005422.
- 900 44. Wang CY, Patel N, Wholey W-Y, Dawid S. ABC transporter content diversity in  
901 *Streptococcus pneumoniae* impacts competence regulation and bacteriocin production.  
902 *Proc Natl Acad Sci*. 2018 May 31;201804668.
- 903 45. Wholey W-Y, Kochan TJ, Storck DN, Dawid S. Coordinated Bacteriocin Expression and  
904 Competence in *Streptococcus pneumoniae* Contributes to Genetic Adaptation through  
905 Neighbor Predation. *PLOS Pathog*. 2016 Feb 3;12(2):e1005413.
- 906 46. Havarstein LS, Diep DB, Nes IF. A family of bacteriocin ABC transporters carry out  
907 proteolytic processing of their substrates concomitant with export. *Mol Microbiol*. 1995  
908 Apr 1;16(2):229–40.
- 909 47. Son MR, Shchepetov M, Adrian PV, Madhi SA, de Gouveia L, von Gottberg A, et al.  
910 Conserved mutations in the pneumococcal bacteriocin transporter gene, *blpA*, result in  
911 a complex population consisting of producers and cheaters. *mBio*. 2011;2(5).
- 912 48. Dixon AS, Schwinn MK, Hall MP, Zimmerman K, Otto P, Lubben TH, et al. NanoLuc  
913 Complementation Reporter Optimized for Accurate Measurement of Protein Interactions  
914 in Cells. *ACS Chem Biol*. 2016 Feb 19;11(2):400–8.
- 915 49. Schwinn MK, Machleidt T, Zimmerman K, Eggers CT, Dixon AS, Hurst R, et al.  
916 CRISPR-Mediated Tagging of Endogenous Proteins with a Luminescent Peptide. *ACS*  
917 *Chem Biol*. 2018 Feb 16;13(2):467–74.
- 918 50. Lanie JA, Ng W-L, Kazmierczak KM, Andrzejewski TM, Davidsen TM, Wayne KJ, et al.  
919 Genome sequence of Avery's virulent serotype 2 strain D39 of *Streptococcus*  
920 *pneumoniae* and comparison with that of unencapsulated laboratory strain R6. *J*  
921 *Bacteriol*. 2007 Jan;189(1):38–51.
- 922 51. Gagne AL, Stevens KE, Cassone M, Pujari A, Abiola OE, Chang DJ, et al. Competence  
923 in *Streptococcus pneumoniae* Is a Response to an Increasing Mutational Burden. *PLOS*  
924 *ONE*. 2013 Aug 13;8(8):e72613.

- 925 52. Hakenbeck R, Chhatwal S. *Molecular Biology of Streptococci*. Horizon Scientific Press;  
926 2007. 594 p.
- 927 53. Moreno-Gómez S, Sorg RA, Domenech A, Kjos M, Weissing FJ, Doorn GS, et al.  
928 Quorum sensing integrates environmental cues, cell density and cell history to control  
929 bacterial competence. *Nat Commun*. 2017 Oct 11;8(1):854.
- 930 54. Mascher T, Zähner D, Merai M, Balmelle N, de Saizieu AB, Hakenbeck R. The  
931 *Streptococcus pneumoniae* *cia* regulon: *CiaR* target sites and transcription profile  
932 analysis. *J Bacteriol*. 2003 Jan;185(1):60–70.
- 933 55. Sebert ME, Patel KP, Plotnick M, Weiser JN. Pneumococcal HtrA protease mediates  
934 inhibition of competence by the *CiaRH* two-component signaling system. *J Bacteriol*.  
935 2005 Jun;187(12):3969–79.
- 936 56. Croucher NJ, Harris SR, Fraser C, Quail MA, Burton J, van der Linden M, et al. Rapid  
937 pneumococcal evolution in response to clinical interventions. *Science*. 2011 Jan  
938 28;331(6016):430–4.
- 939 57. Croucher NJ, Chewapreecha C, Hanage WP, Harris SR, McGee L, van der Linden M,  
940 et al. Evidence for soft selective sweeps in the evolution of pneumococcal multidrug  
941 resistance and vaccine escape. *Genome Biol Evol*. 2014;6(7):1589–602.
- 942 58. Wyres KL, Lamberts LM, Croucher NJ, McGee L, von Gottberg A, Liñares J, et al.  
943 The multidrug-resistant PMEN1 pneumococcus is a paradigm for genetic success.  
944 *Genome Biol*. 2012 Nov 16;13(11):R103.
- 945 59. Severin A, Figueiredo AM, Tomasz A. Separation of abnormal cell wall composition  
946 from penicillin resistance through genetic transformation of *Streptococcus pneumoniae*.  
947 *J Bacteriol*. 1996 Apr;178(7):1788–92.
- 948 60. Paixão L, Oliveira J, Veríssimo A, Vinga S, Lourenço EC, Ventura MR, et al. Host  
949 glycan sugar-specific pathways in *Streptococcus pneumoniae*: galactose as a key sugar  
950 in colonisation and infection. *PLoS One*. 2015;10(3):e0121042.
- 951 61. Hiller NL, Eutsey RA, Powell E, Earl JP, Janto B, Martin DP, et al. Differences in  
952 Genotype and Virulence among Four Multidrug-Resistant *Streptococcus pneumoniae*  
953 Isolates Belonging to the PMEN1 Clone. *PLoS ONE*. 2011 Dec 19;6(12):e28850.
- 954 62. Zähner D, Hakenbeck R. The *Streptococcus pneumoniae* Beta-Galactosidase Is a  
955 Surface Protein. *J Bacteriol*. 2000 Oct;182(20):5919–21.
- 956 63. Geiss GK, Bumgarner RE, Birditt B, Dahl T, Dowidar N, Dunaway DL, et al. Direct  
957 multiplexed measurement of gene expression with color-coded probe pairs. *Nat*  
958 *Biotechnol*. 2008 Mar;26(3):317–25.
- 959 64. Carvalho SM, Kloosterman TG, Kuipers OP, Neves AR. *CcpA* Ensures Optimal  
960 Metabolic Fitness of *Streptococcus pneumoniae*. *PLoS ONE*. 2011 Oct  
961 21;6(10):e26707.



- 962 65. Kim W, Park HK, Hwang W-J, Shin H-S. Simultaneous Detection of *Streptococcus*  
963 *pneumoniae*, *S. mitis*, and *S. oralis* by a Novel Multiplex PCR Assay Targeting the *gyrB*  
964 Gene. *J Clin Microbiol.* 2013 Mar;51(3):835–40.
- 965 66. Ramakers C, Ruijter JM, Deprez RHL, Moorman AFM. Assumption-free analysis of  
966 quantitative real-time polymerase chain reaction (PCR) data. *Neurosci Lett.* 2003 Mar  
967 13;339(1):62–6.
- 968 67. Ruijter JM, Lorenz P, Tuomi JM, Hecker M, van den Hoff MJB. Fluorescent-increase  
969 kinetics of different fluorescent reporters used for qPCR depend on monitoring  
970 chemistry, targeted sequence, type of DNA input and PCR efficiency. *Mikrochim Acta.*  
971 2014;181(13–14):1689–96.
- 972 68. Miller, JH. Assay of b-galactosidase. In: *Experiments in Molecular Genetics.* Cold  
973 Spring Harbor, New York: Laboratory Press; 1972. p. 352–5.
- 974 69. Heydorn A, Nielsen AT, Hentzer M, Sternberg C, Givskov M, Ersbøll BK, et al.  
975 Quantification of biofilm structures by the novel computer program COMSTAT. *Microbiol*  
976 *Read Engl.* 2000 Oct;146 ( Pt 10):2395–407.
- 977 70. Al-Bayati FAY, Kahya HFH, Damianou A, Shafeeq S, Kuipers OP, Andrew PW, et al.  
978 Pneumococcal galactose catabolism is controlled by multiple regulators acting on  
979 pyruvate formate lyase. *Sci Rep.* 2017 Feb 27;7:43587.
- 980 71. Kahya HF, Andrew PW, Yesilkaya H. Deacetylation of sialic acid by esterases  
981 potentiates pneumococcal neuraminidase activity for mucin utilization, colonization and  
982 virulence. *PLOS Pathog.* 2017 Mar 3;13(3):e1006263.
- 983 72. Papadopoulos JS, Agarwala R. COBALT: constraint-based alignment tool for multiple  
984 protein sequences. *Bioinformatics.* 2007 May 1;23(9):1073–9.
- 985 73. Waterhouse AM, Procter JB, Martin DMA, Clamp M, Barton GJ. Jalview Version 2—a  
986 multiple sequence alignment editor and analysis workbench. *Bioinformatics.* 2009 May  
987 1;25(9):1189–91.
- 988 74. Darling ACE, Mau B, Blattner FR, Perna NT. Mauve: Multiple Alignment of Conserved  
989 Genomic Sequence With Rearrangements. *Genome Res.* 2004 Jul 1;14(7):1394–403.
- 990 75. Darling AE, Mau B, Perna NT. progressiveMauve: Multiple Genome Alignment with  
991 Gene Gain, Loss and Rearrangement. *PLoS ONE.* 2010 Jun 25;5(6):e111147.
- 992 76. Katoh K, Misawa K, Kuma K, Miyata T. MAFFT: a novel method for rapid multiple  
993 sequence alignment based on fast Fourier transform. *Nucleic Acids Res.* 2002 Jul  
994 15;30(14):3059–66.
- 995 77. Posada D, Crandall KA. MODELTEST: testing the model of DNA substitution.  
996 *Bioinforma Oxf Engl.* 1998;14(9):817–8.
- 997 78. Guindon S, Dufayard J-F, Lefort V, Anisimova M, Hordijk W, Gascuel O. New  
998 Algorithms and Methods to Estimate Maximum-Likelihood Phylogenies: Assessing the  
999 Performance of PhyML 3.0. *Syst Biol.* 2010 May 1;59(3):307–21.

- 1000 79. Letunic I, Bork P. Interactive tree of life (iTOL) v3: an online tool for the display and  
1001 annotation of phylogenetic and other trees. *Nucleic Acids Res.* 2016 Jul  
1002 8;44(W1):W242-245.
- 1003 80. Overbeek R, Olson R, Pusch GD, Olsen GJ, Davis JJ, Disz T, et al. The SEED and the  
1004 Rapid Annotation of microbial genomes using Subsystems Technology (RAST). *Nucleic  
1005 Acids Res.* 2014 Jan 1;42(D1):D206–14.
- 1006 81. Lassmann T, Sonnhammer EL. Kalign – an accurate and fast multiple sequence  
1007 alignment algorithm. *BMC Bioinformatics.* 2005;6:298.
- 1008 82. Crooks GE, Hon G, Chandonia J-M, Brenner SE. WebLogo: a sequence logo generator.  
1009 *Genome Res.* 2004 Jun;14(6):1188–90.
- 1010
- 1011

## Figure 1

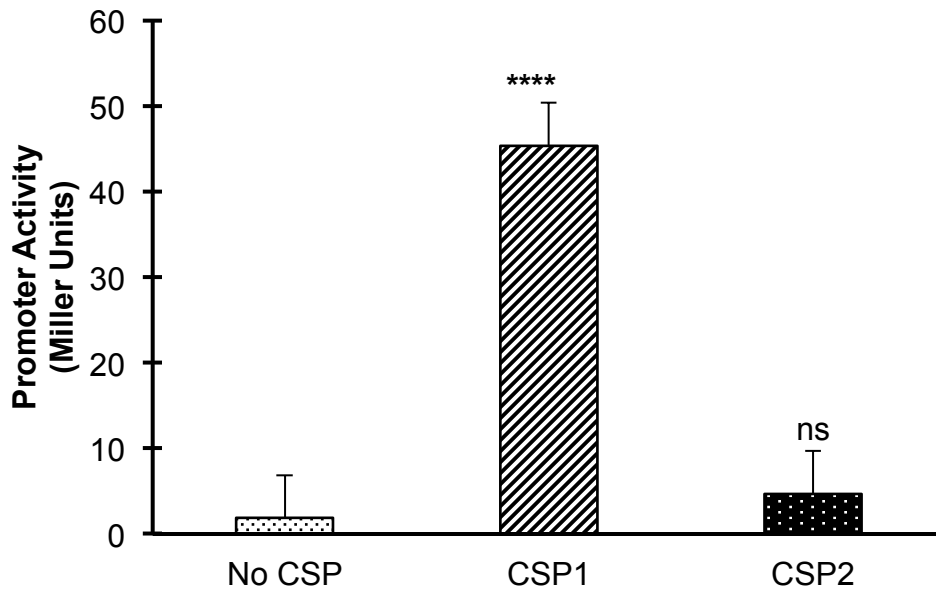

**Fig. 1. Expression of *briC* is induced by cognate CSP.**  $\beta$ -galactosidase assay measuring *PbriC-lacZ* activity in pneumococcal R6 cells grown to exponential phase in Columbia Broth at pH 6.6 followed by no treatment or treatment with CSP1 or CSP2 for 30 minutes. Y-axis denotes *PbriC-lacZ* expression levels in Miller Units. Activity is expressed in nmol p-nitrophenol/min/ml. Error bars represent standard error of the mean for biological replicates (at least  $n=3$ ); \*\*\*\*  $p<0.0001$  using ANOVA followed by Tukey's post-test.

## Figure 2

(A)

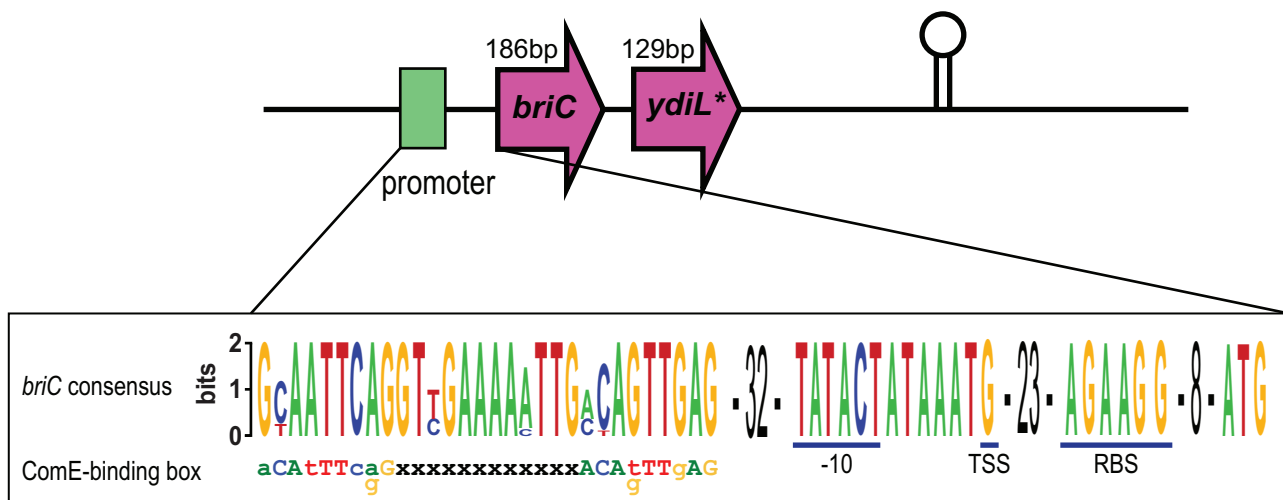

## Figure 2

(B)

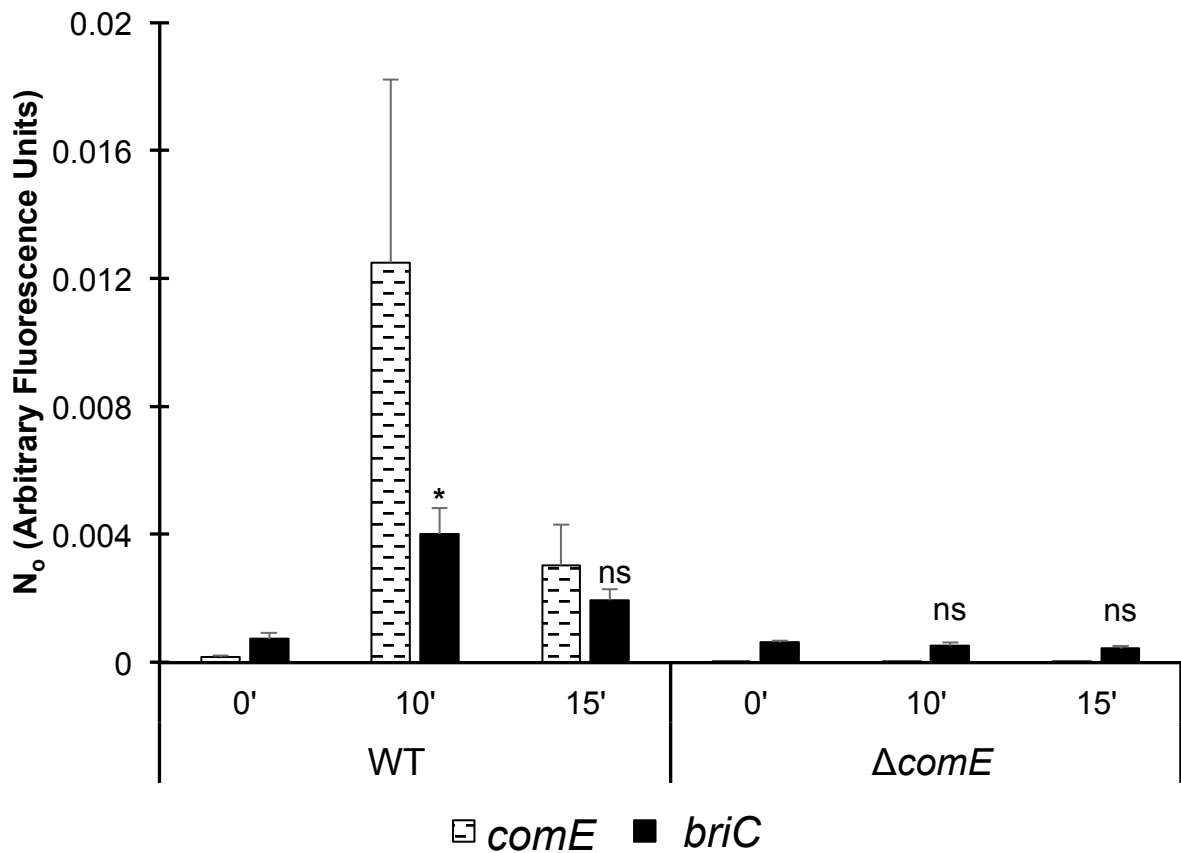

Fig. 2. **CSP-induction of *briC* is ComE-dependent.** (A) Genomic organization of the *briC* locus, displaying a ComE-binding box. Green: ComE-binding box within the *briC* promoter region. The expanded region denotes a logo of ComE-binding box generated from thirty-four pneumococcal genomes represented in Figure 4A. This consensus is aligned with the published ComE-binding box consensus sequence (Ween et al., 1999). The putative -10 region, the transcription start site (TSS) as determined by Cappable-Seq (Slager et al., 2018), the ribosome binding site (RBS) and the transcriptional terminator are labeled. The downstream gene is predicted to be a pseudogene in R6D, R6 and D39. In TIGR4, this region encodes two coding sequences (SP\_0430 and SP\_0431). The R6D sequence corresponds to the C-terminal of SP\_0430. (B) mRNA transcript levels of *briC* (solid black) and *comE* (dashed black lines) as measured by qRT-PCR in R6D WT & R6D $\Delta comE$  cells. Cells were grown in Columbia broth at pH 6.6 to an OD<sub>600</sub> of 0.3, and then treated with CSP1 for either 0', 10' or 15'. Data was normalized to 16S rRNA levels. Y-axis denotes normalized concentrations of mRNA levels in arbitrary fluorescence units as calculated from LinRegPCR. Error bars represent standard error of the mean calculated for biological replicates ( $n=3$ ); 'ns' denotes non-significant, \*  $p<0.05$  using ANOVA followed by Tukey's post-test relative to the respective 0' CSP treatment. Further, *briC* levels are also significantly higher in WT relative to  $\Delta comE$  cells for the same time points post-CSP treatment ( $p<0.05$ ).

## Figure 3

(A)

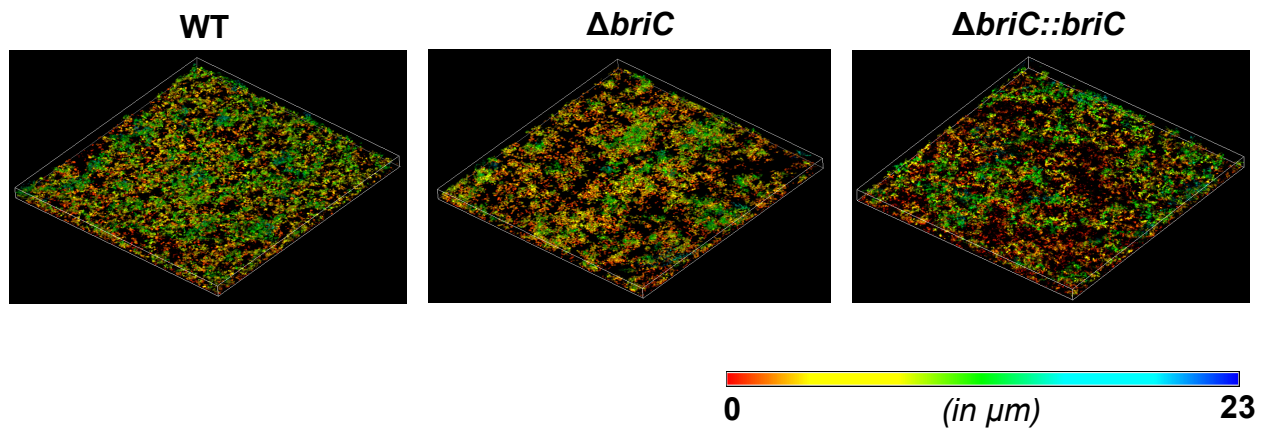

(B)

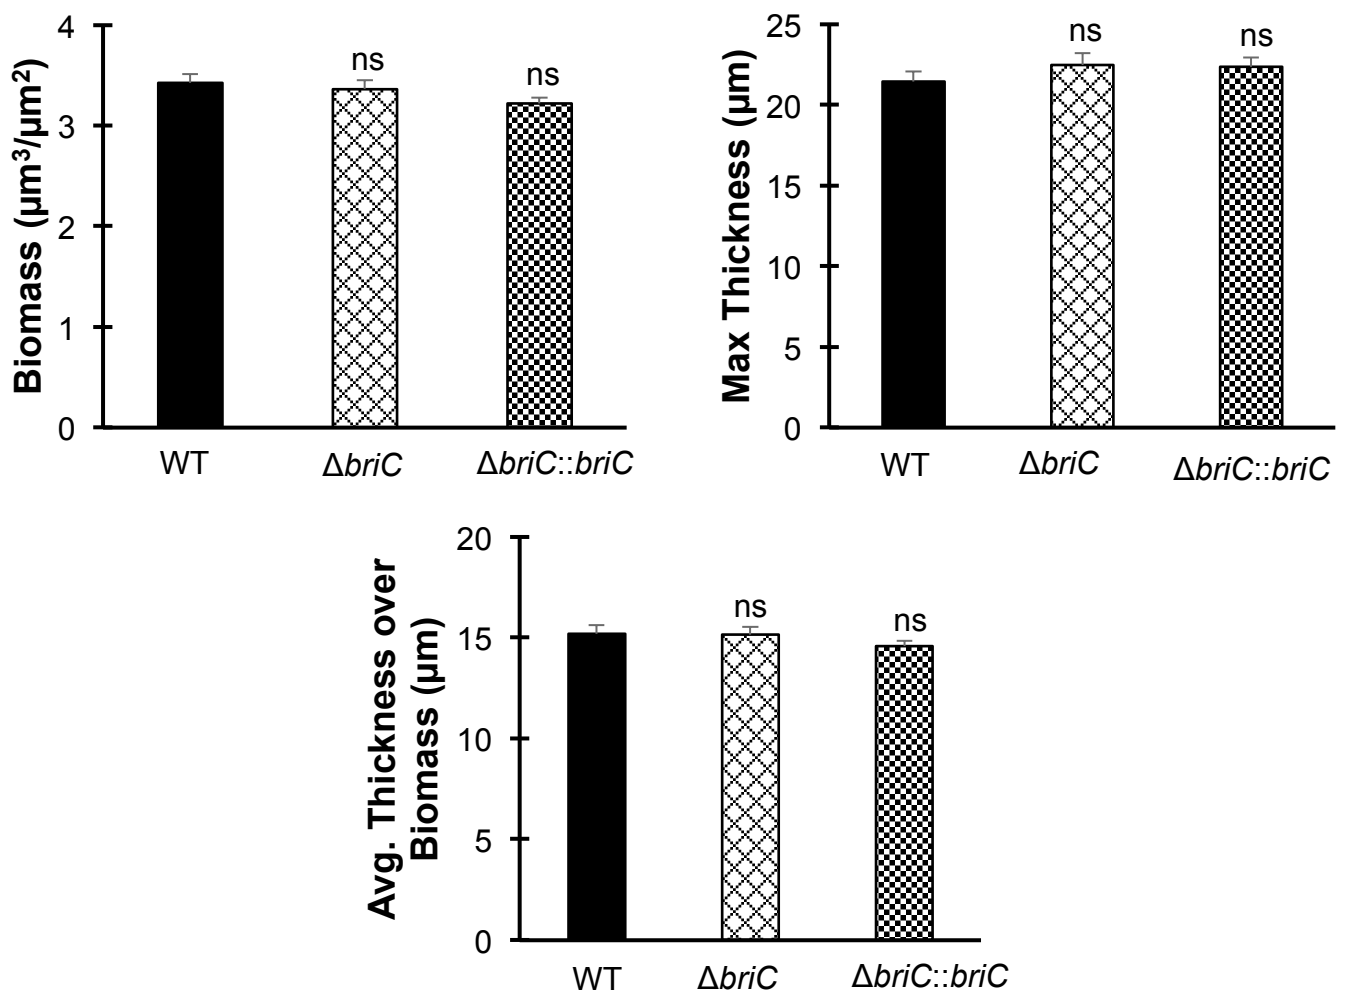

## Figure 3

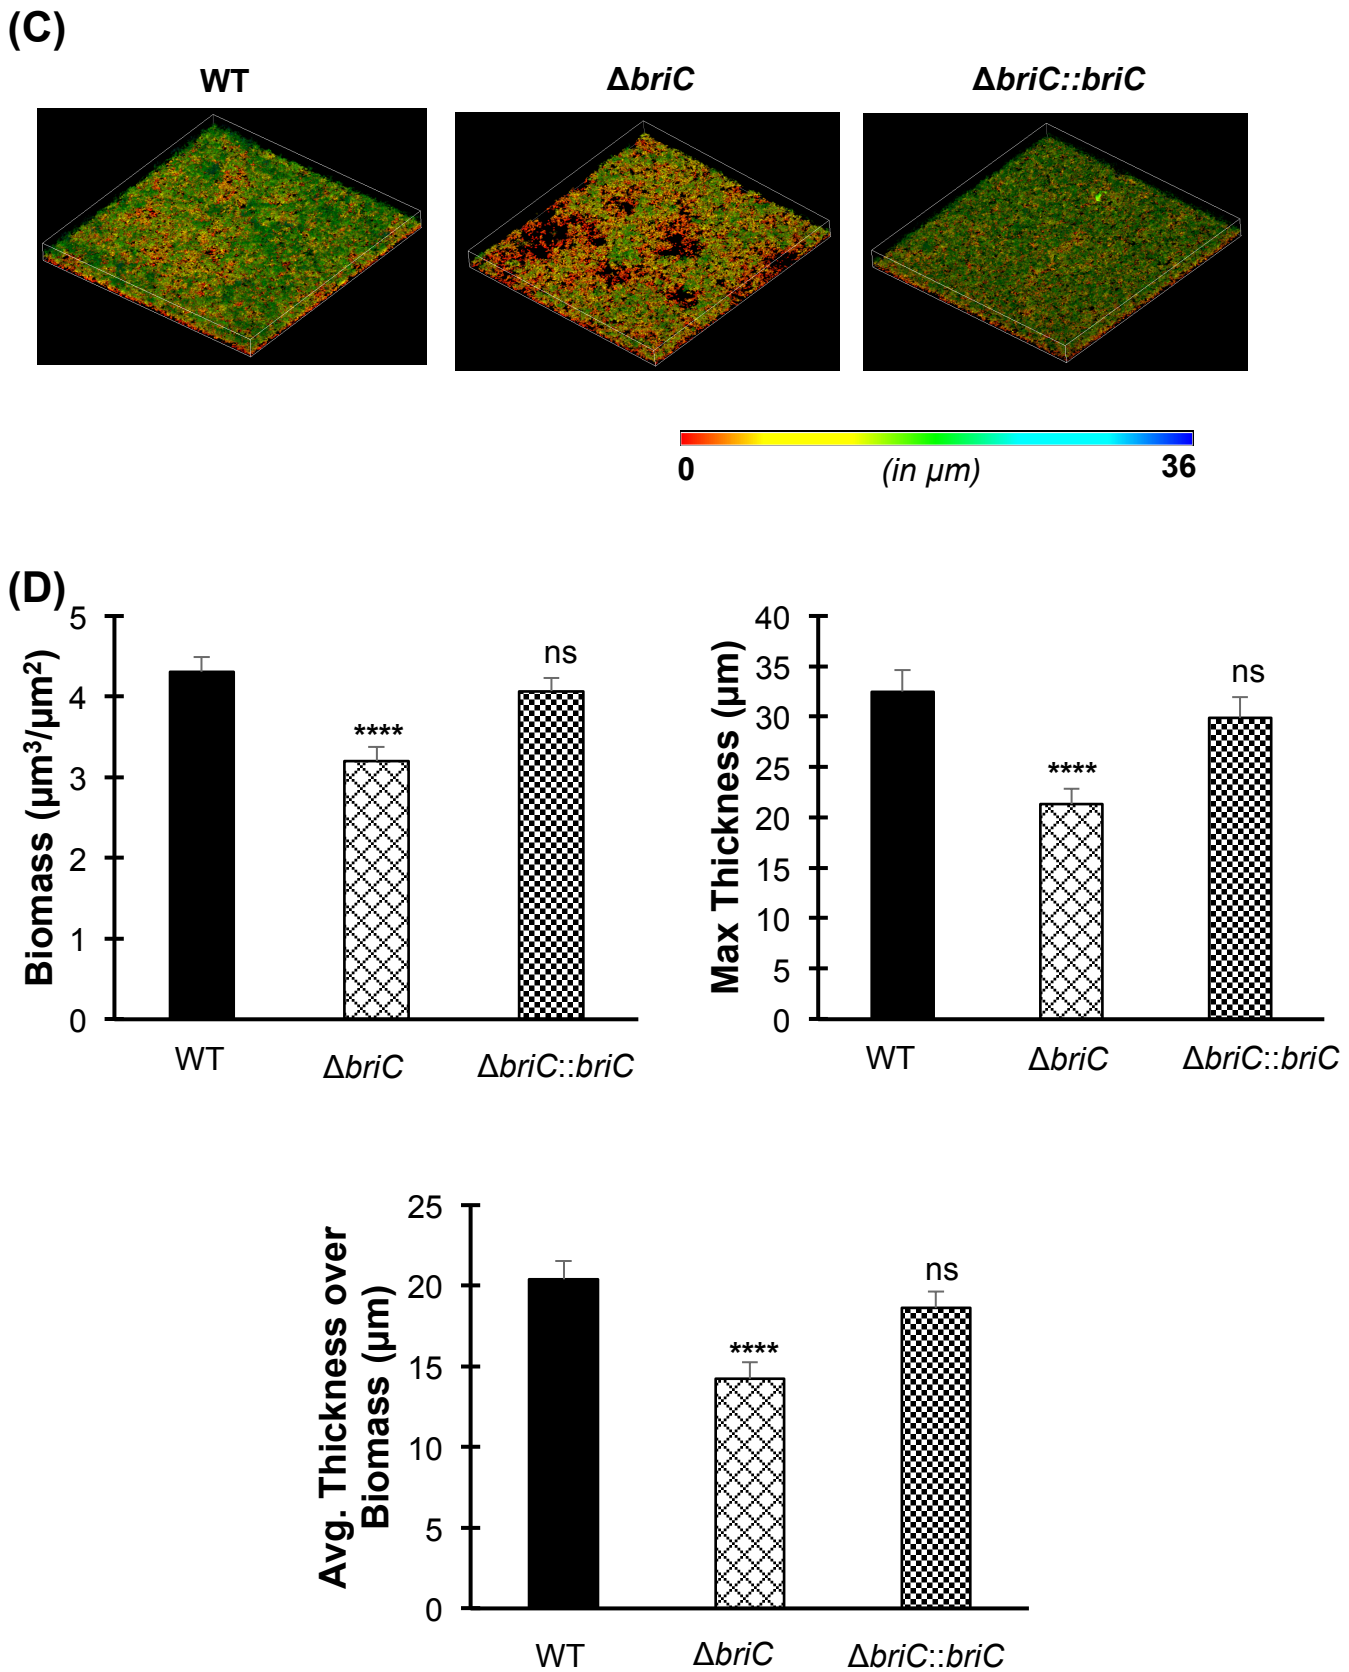



**Fig. 3. BriC stimulates late biofilm development.** Representative confocal microscopy images showing top view of the reconstructed biofilm stacks of WT,  $\Delta briC$  and  $\Delta briC::briC$  cells of strain R6D stained with SYTO59 dye at **(A)** 24-hr, and **(C)** 72-hr. Images are pseudo-colored according to depth (scales shown). COMSTAT2 quantification of **(B)** 24-hr, and **(D)** 72-hr biofilm images. Y-axis denotes units of measurement:  $\mu\text{m}^3/\mu\text{m}^2$  for biomass, and  $\mu\text{m}$  for maximum thickness and average thickness over biomass. Error bars represent standard error of the mean calculated for biological replicates ( $n=3$ ); “ns” denotes non-significant comparisons, \*\*\*\*  $p<0.0001$  using ANOVA followed by Tukey’s post-test.

# Figure 4

(A)

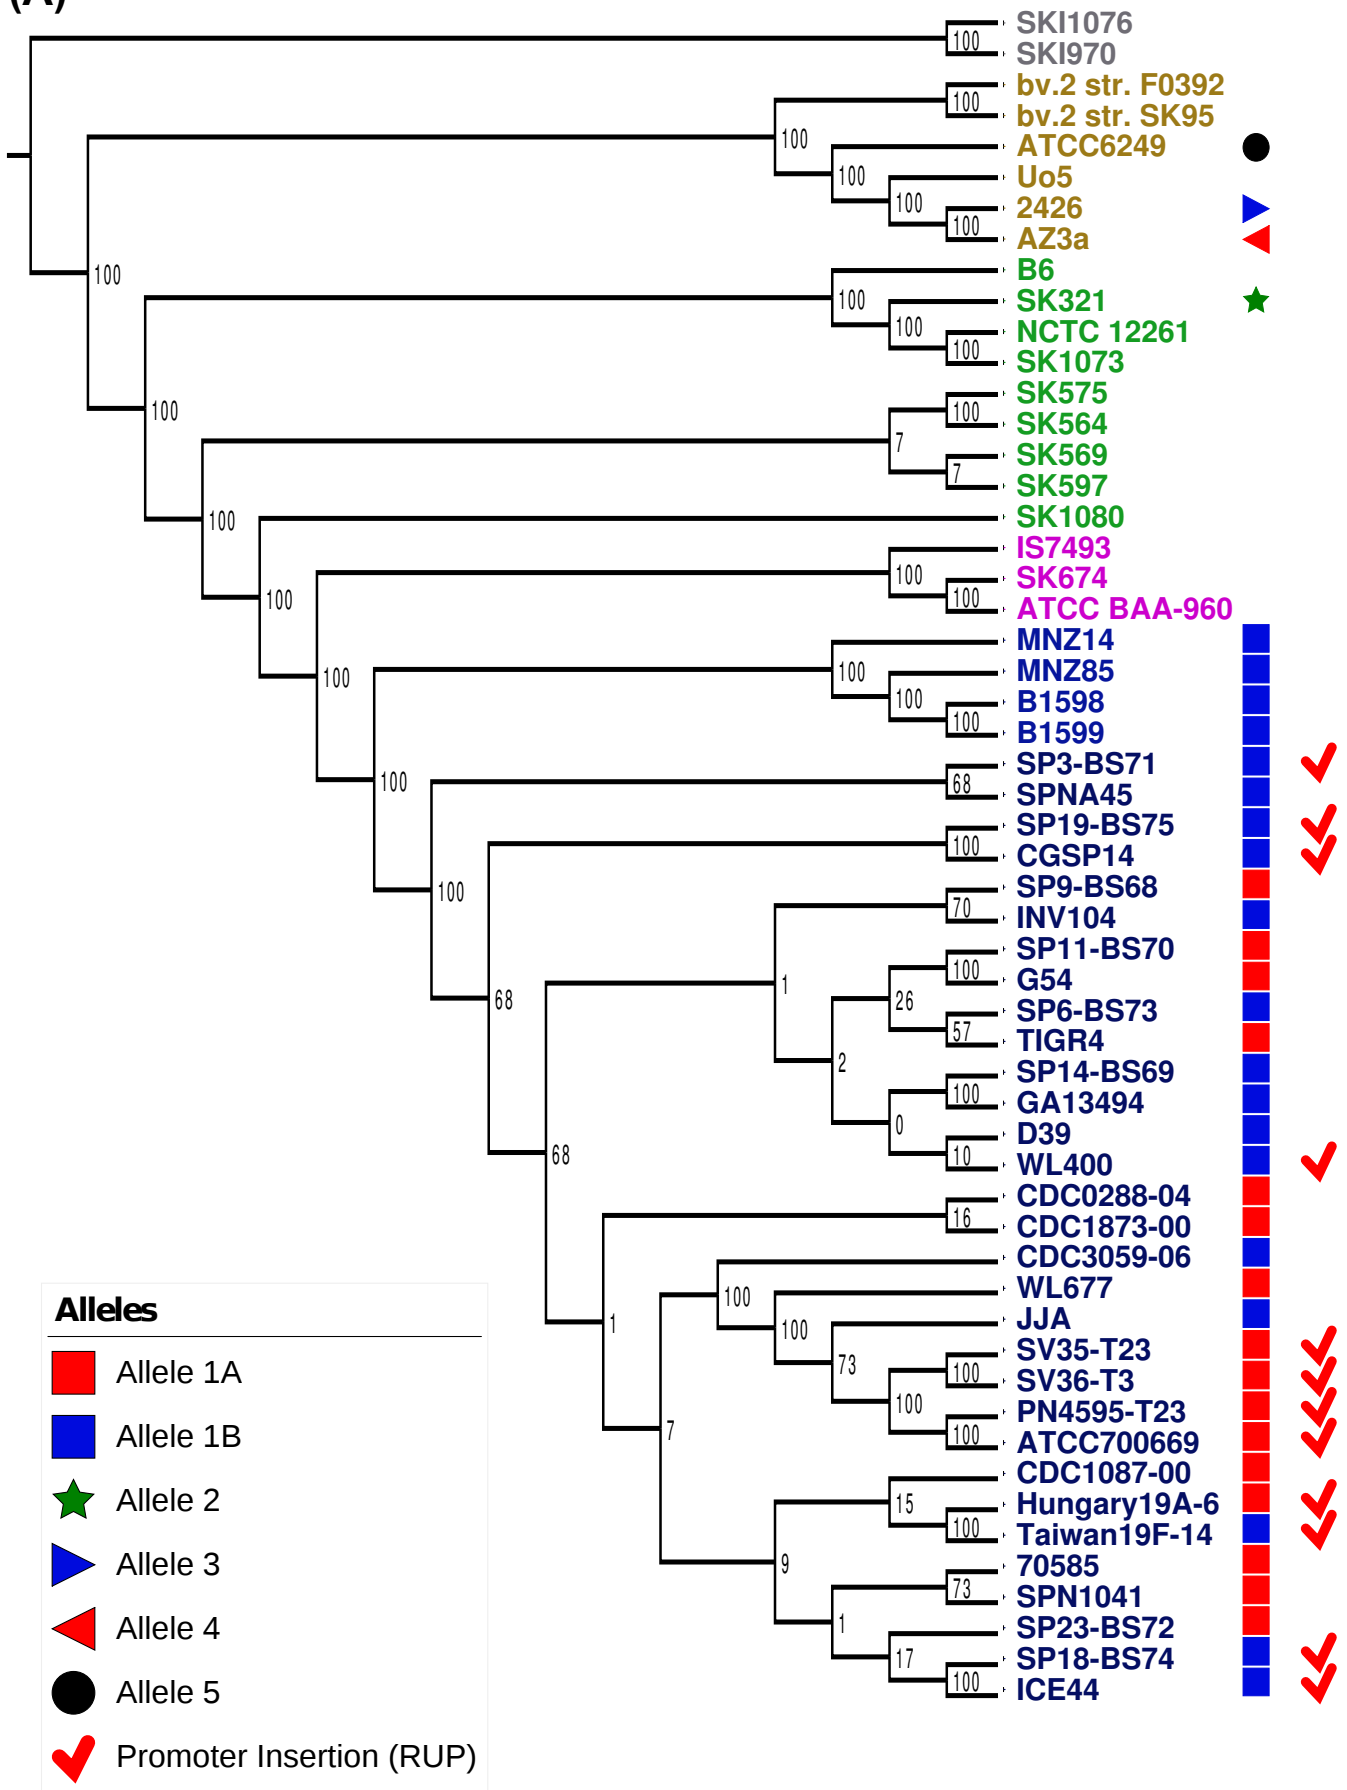

(B)

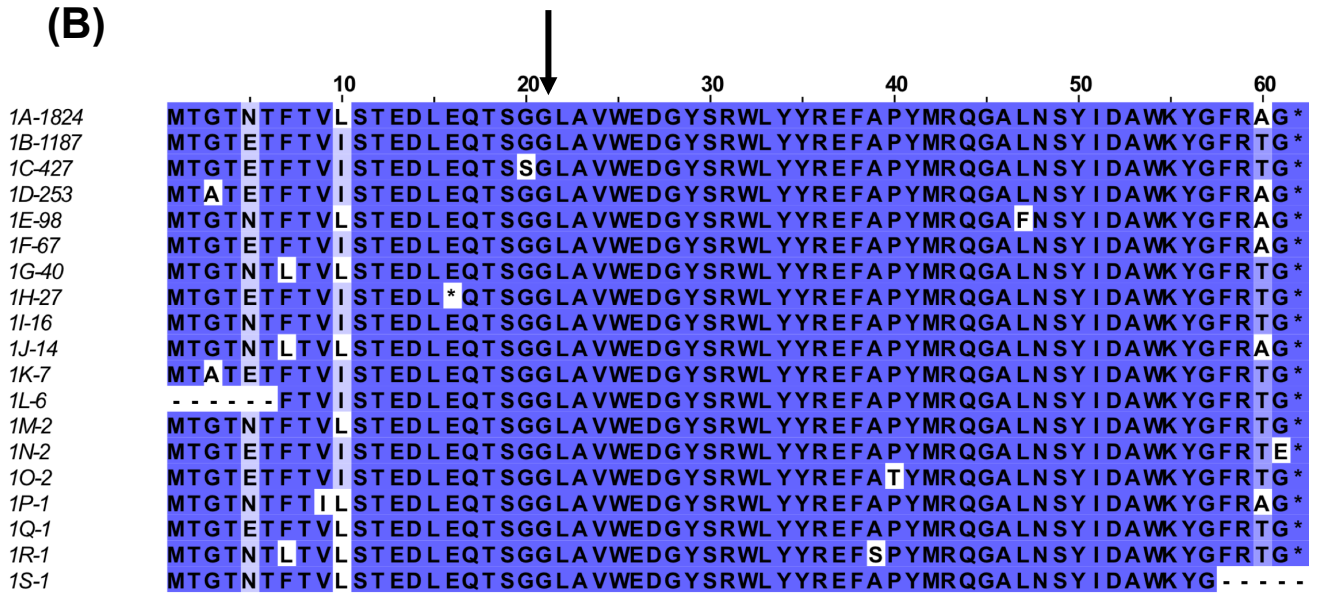

**Fig. 4. Distribution of the genomic region encoding BriC across streptococcal strains.** (A) Distribution of *briC* alleles in fifty-five streptococcal genomes. The *briC* alleles are visualized against a maximum likelihood tree of streptococcal genomes generated from the core genome, where the numbers on the branches represent bootstrap values. Different species in the tree are color-coded as follows: *S. pneumoniae* (blue), *S. pseudopneumoniae* (pink), *S. mitis* (green), *S. oralis* (beige), and *S. infantis* (grey). The shapes at the tip of the branches illustrate *briC* alleles. Types 1A and 1B represent variants of the alleles widespread across pneumococcal strains; types 3-5 denotes alleles outside the species. The red tick denotes strains that have a long *briC* promoter due to a RUP insertion. In PMEN1 strains, this variant leads to increase in basal levels of *briC* in a CSP-independent manner. (B) Alignment of 19 BriC alleles identified in the database of 4,034 pneumococcal genomes. Alleles are labeled 1A-1S followed by the number of representatives in the database (total 3,976). Sequences are colored based on percent identity to highlight the variability between alleles. Black arrow denotes the predicted cleavage site.

## Figure 5

A

*S. pneumoniae* R6

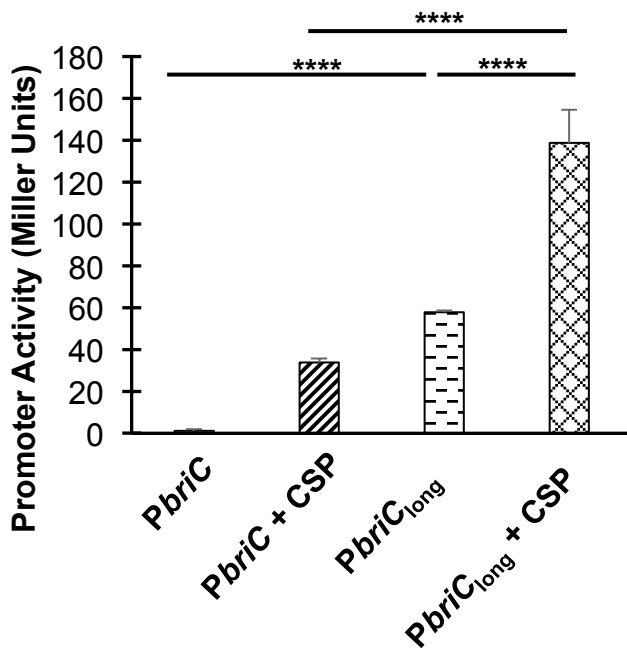

B

*S. pneumoniae* PN4595-T23

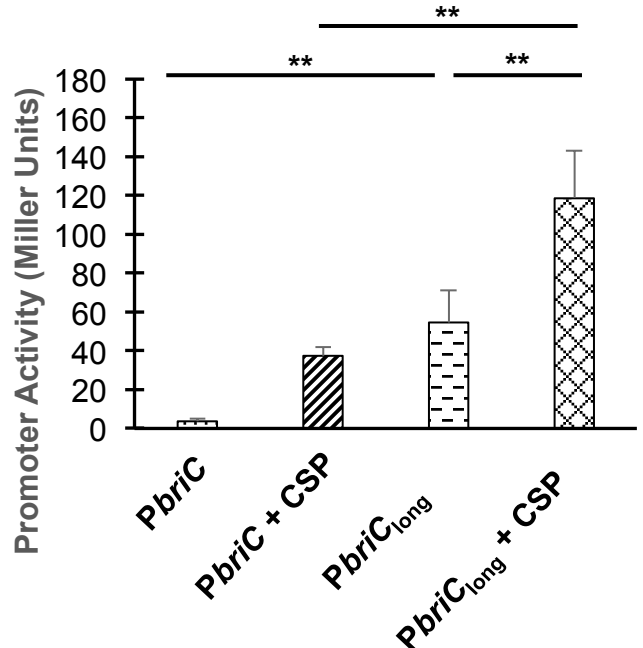

**Fig. 5. Long *briC* promoter is associated with an increase in the basal levels of *briC*.**  $\beta$ -galactosidase assay comparing the LacZ activity of the R6 (short promoter, *PbrIC-lacZ*) and PN4595-T23 (long promoter with RUP, *PbrIC<sub>long</sub>-lacZ*) promoters. Both promoter activities were tested in (A) strain R6 and (B) strain PN4595-T23. Cells were grown in Columbia broth at pH 6.6 until mid-log phase, followed by either no treatment or treatment with CSP for 30 minutes. Y-axis denotes promoter activity in Miller Units expressed in nmol p-nitrophenol/min/ml. Error bars represent standard error of the mean for biological replicates ( $n=3$ ); \*\*  $p<0.01$ , & \*\*\*\*  $p<0.0001$  using ANOVA followed by Tukey's post-test.

## Figure 6

(A)

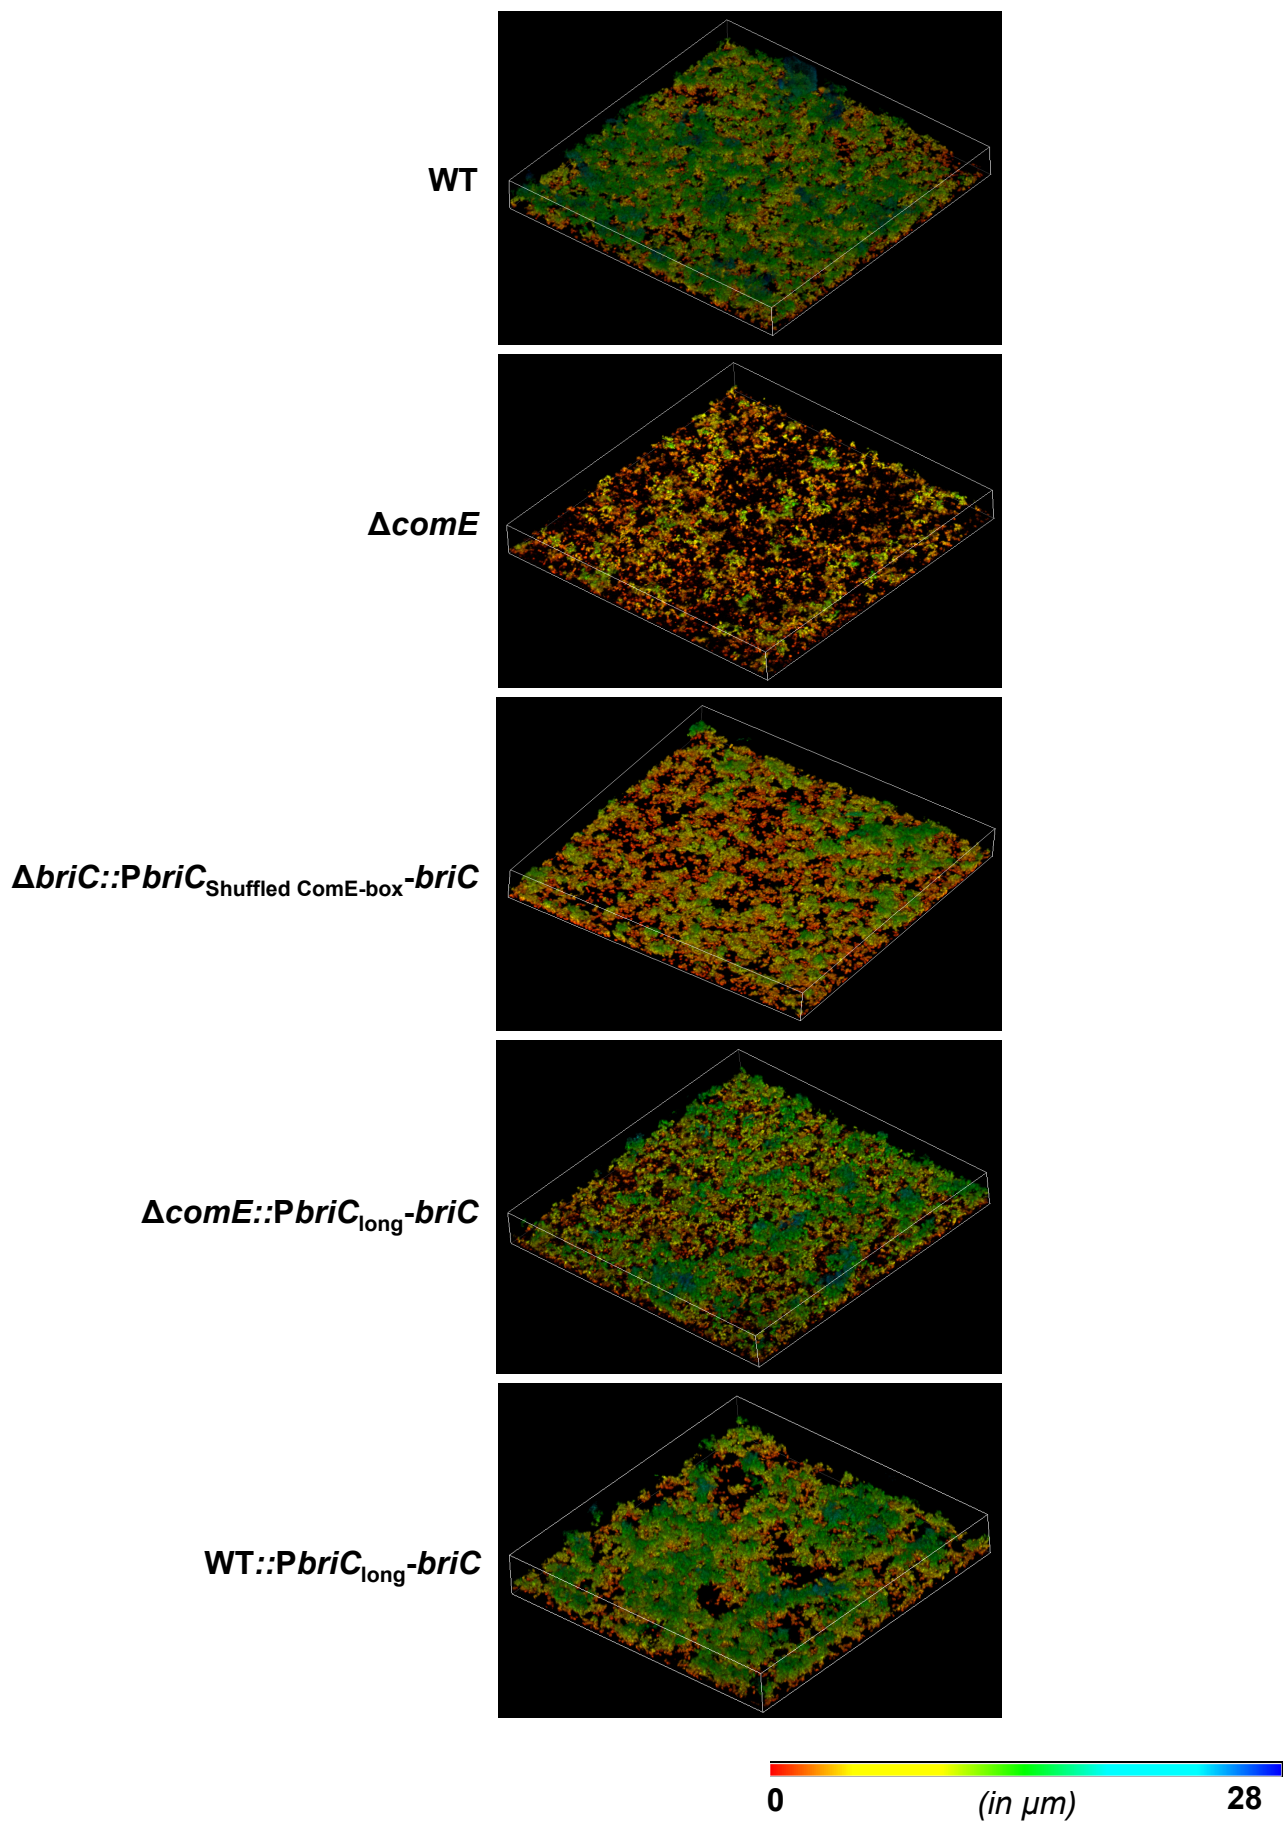

(B)

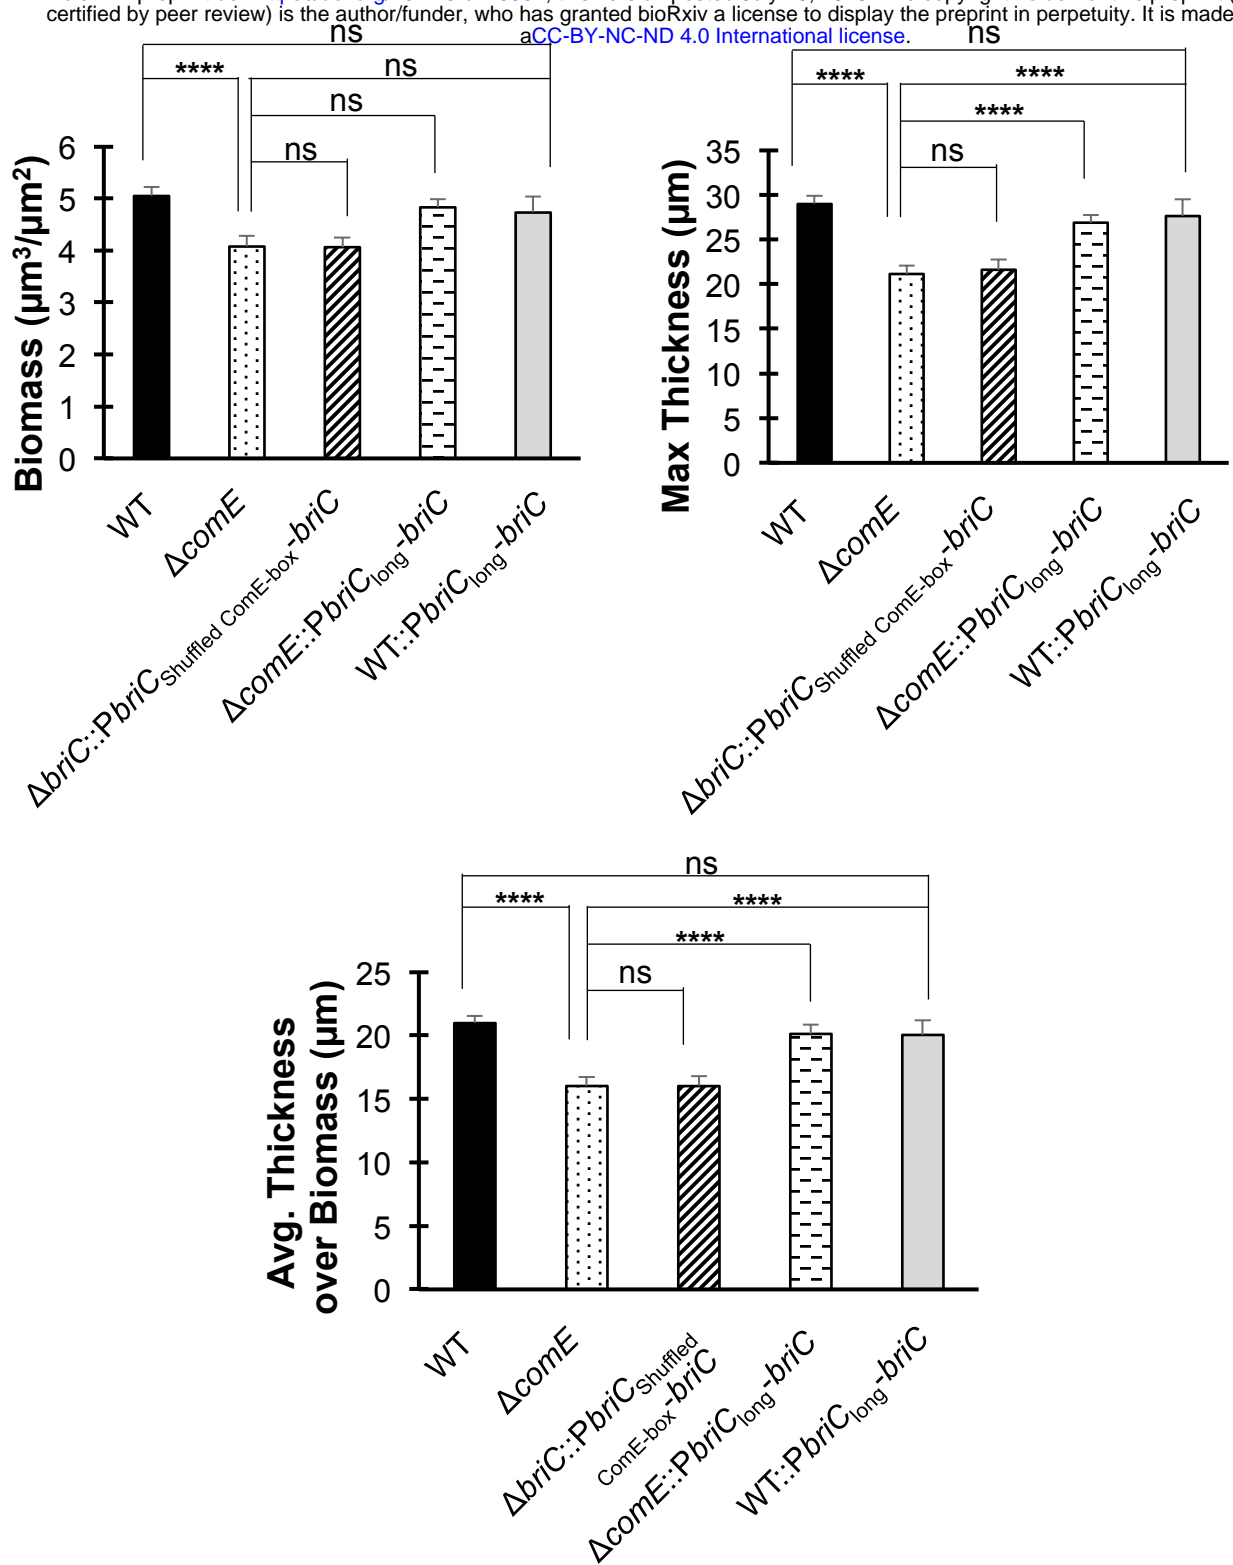

**Fig. 6. BriC plays a pivotal role in regulating biofilm development. (A)** Representative confocal microscopy images showing top view of the reconstructed biofilm stacks of WT,  $\Delta comE$ ,  $\Delta briC::PbriC_{Shuffled} ComE-box -briC$ ,  $\Delta comE::PbriC_{long} -briC$  and  $WT::PbriC_{long} -briC$  cells of strain R6D stained with SYTO59 dye at 72-hr. Images are pseudo-colored according to depth (scale shown). **(B)** COMSTAT2 quantification of 72-hr biofilm images. Y-axis denotes units of measurement:  $\mu m^3/\mu m^2$  for biomass, and  $\mu m$  for maximum thickness and average thickness over biomass. Error bars represent standard error of the mean calculated for biological replicates (at least  $n=3$ ); “ns” denotes non-significant comparisons, and \*\*\*\*  $p < 0.0001$  using ANOVA followed by Tukey’s post-test.

## Figure 7

(A)

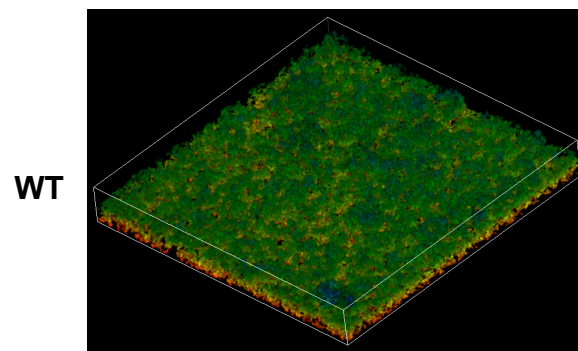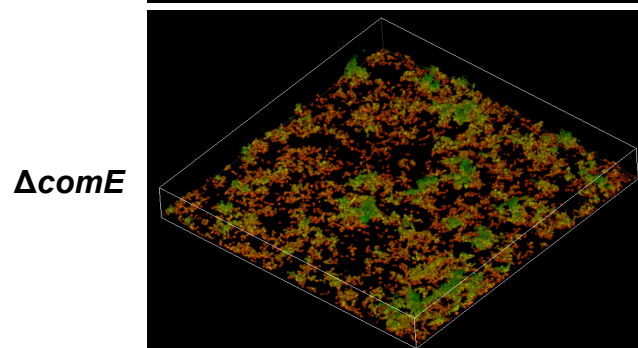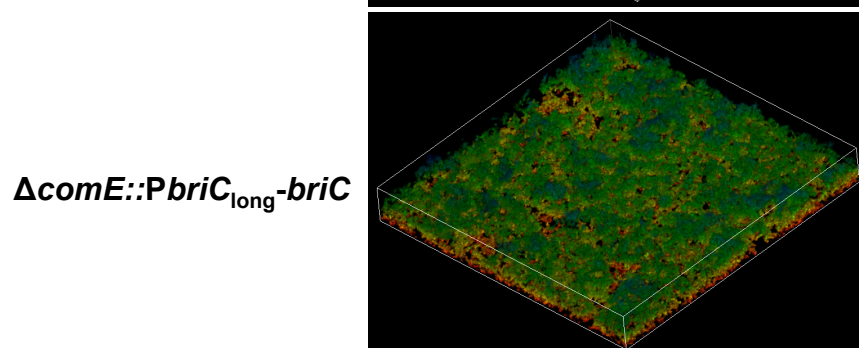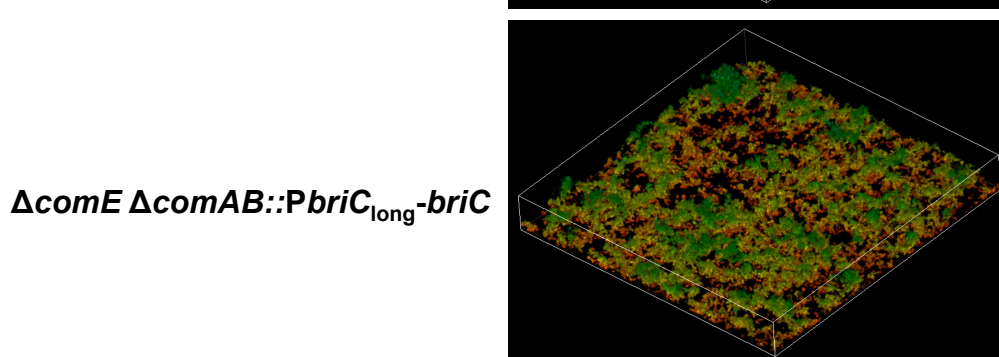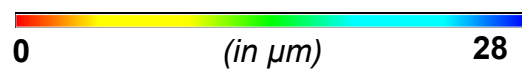



(B)

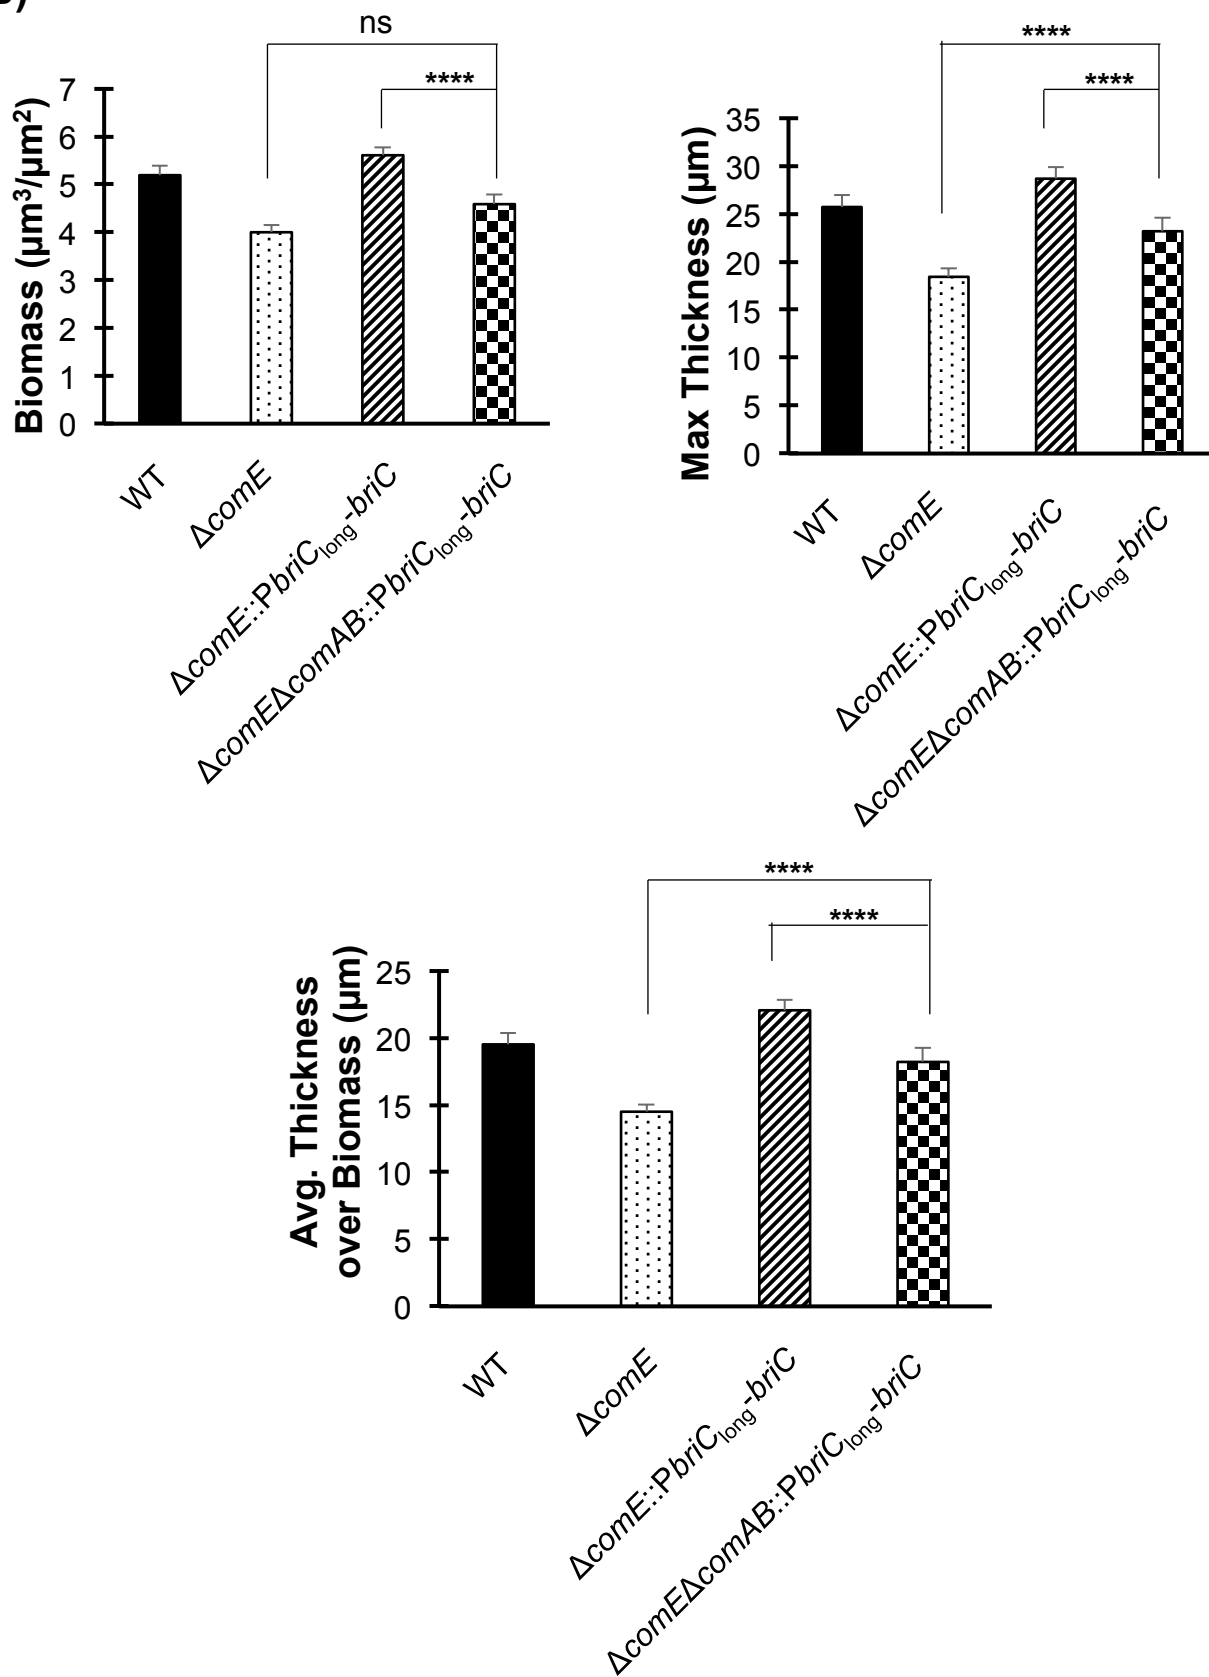

(C)

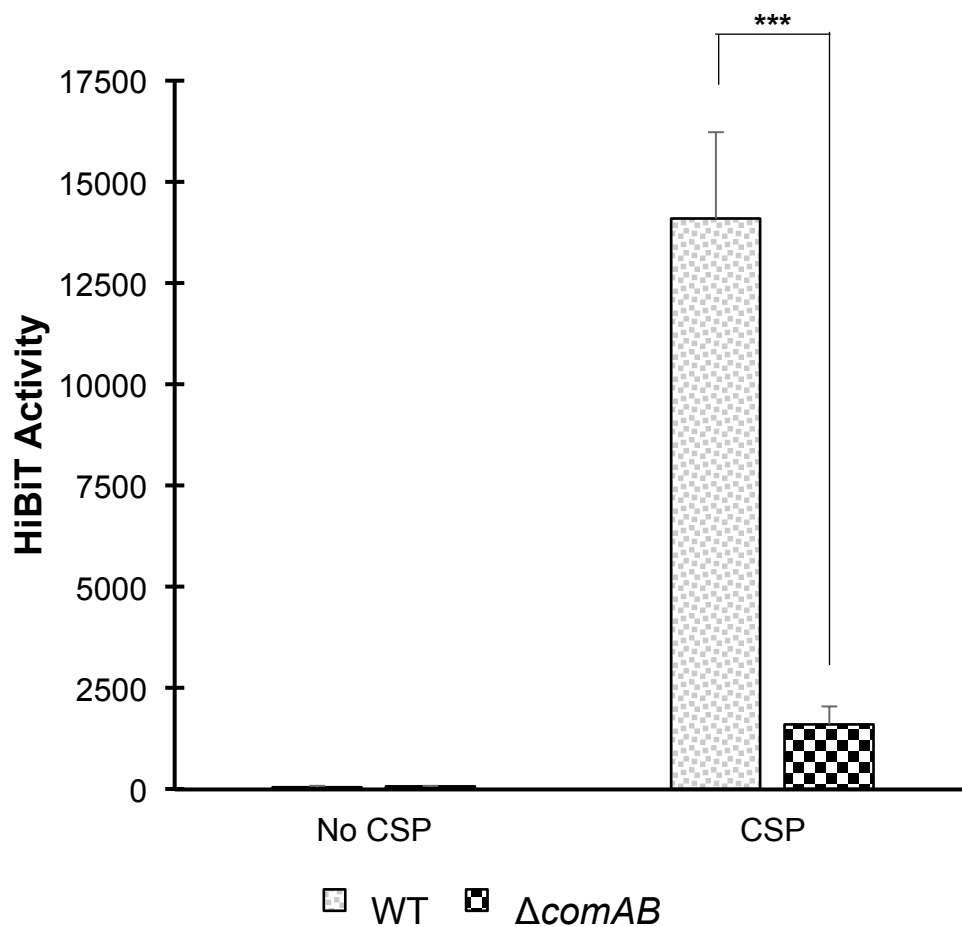

**Fig. 7. ComAB plays a role in the export of BriC.** (A) Representative confocal microscopy images showing top view of the reconstructed biofilm stacks of WT,  $\Delta comE$ ,  $\Delta comE::PbriC_{long}-briC$  and  $\Delta comE\Delta comAB::PbriC_{long}-briC$  cells of strain R6D stained with SYTO59 dye at 72-hr. Images are pseudo-colored according to depth (scale shown). (B) COMSTAT2 quantification of 72-hr biofilm images. Y-axis denotes units of measurement:  $\mu m^3/\mu m^2$  for biomass, and  $\mu m$  for maximum thickness and average thickness over biomass. Error bars represent standard error of the mean calculated for biological replicates (at least  $n=3$ ). (C) Extracellular Nano-Glo HiBiT activity of the BriC reporter produced by WT and  $\Delta comAB$  cells (whole cells). The HiBiT activity was measured by recording luminescence with an integration time of 2000 milliseconds. Error bars represent standard deviation calculated for biological replicates ( $n=3$ ); “ns” denotes non-significant comparisons, \*\*\*  $p<0.001$ , and \*\*\*\*  $p<0.0001$  using ANOVA followed by Tukey’s post-test.

Figure 8

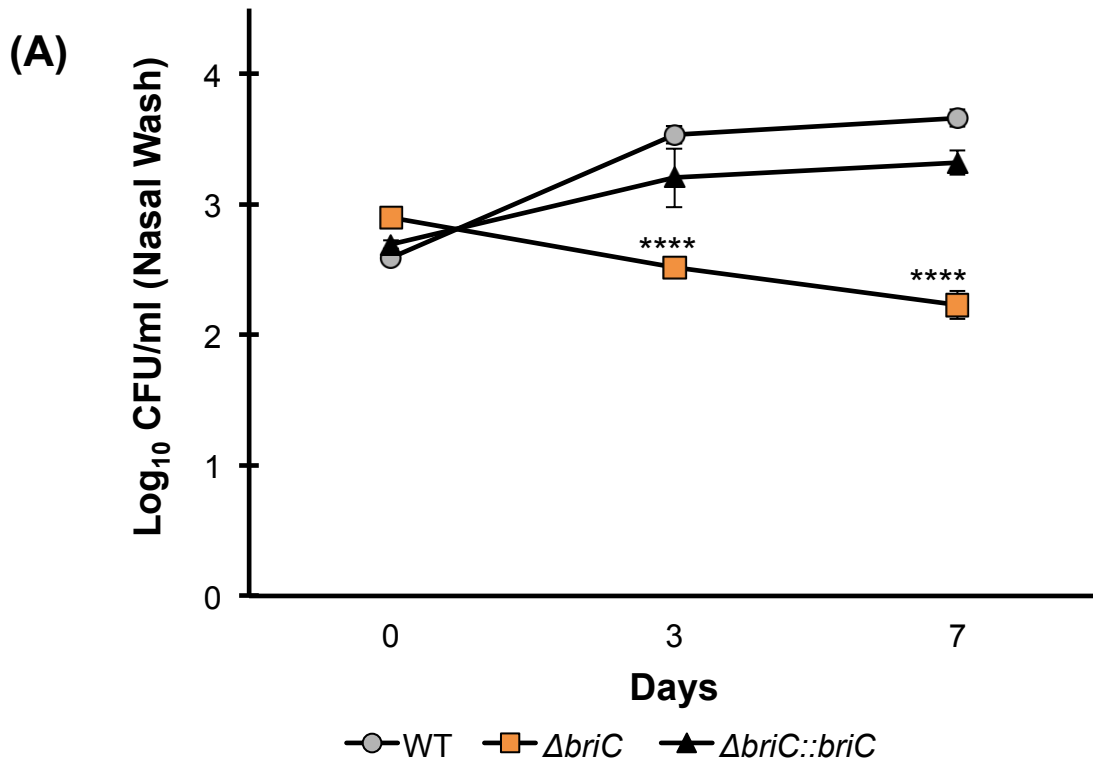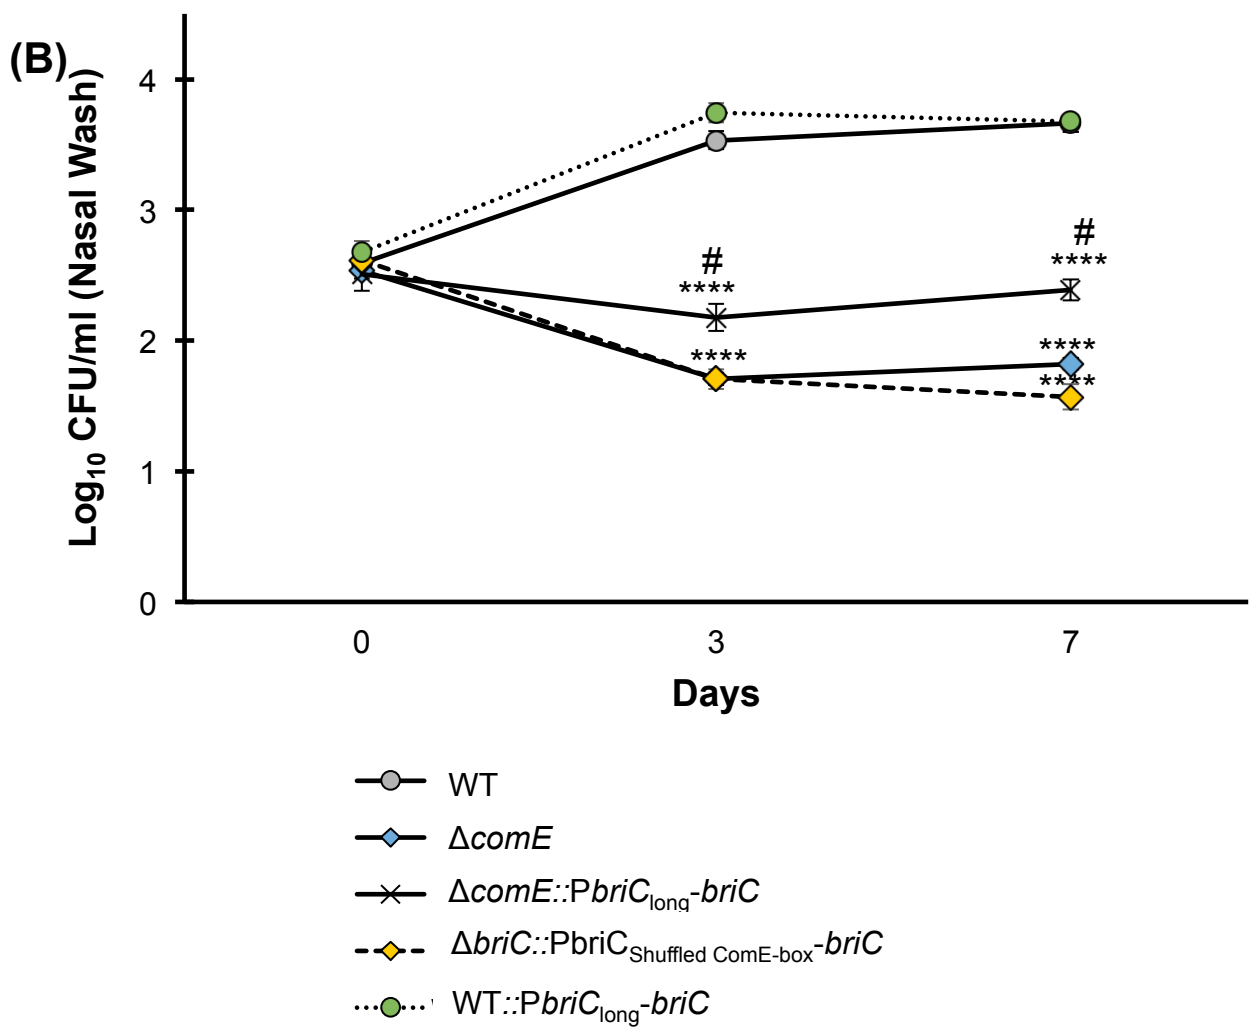

**Fig. 8. BriC contributes to pneumococcal colonization of the mouse nasopharynx.** CD1 mice were infected intranasally with 20 $\mu$ l PBS containing approximately  $1 \times 10^5$  CFU of **(A)** WT (grey circles),  $\Delta briC$  (orange squares), and  $\Delta briC::briC$  (black triangles) **(B)** WT (grey circles),  $\Delta comE$  (blue diamonds), and  $\Delta comE::PbriC_{long}-briC$  (black crosses),  $\Delta briC::PbriC_{Shuffled ComE-box}-briC$  (yellow triangles), and WT:: $PbriC_{long}-briC$  (green circles) cells of the pneumococcal strain D39. At predetermined time points (0, 3 & 7 days post-infection), at least five mice were culled, and the pneumococcal counts in the nasopharyngeal washes were enumerated by plating on blood agar. Y-axis represents  $\text{Log}_{10}$  counts of CFU recovered from nasal washes. X-axis represents days post-inoculation. Each data point represents the mean of data from at least five mice. Error bars show the standard error of the mean. \*\*\*\*  $p < 0.0001$  relative to the WT strain, and #  $p < 0.0001$  relative to the  $\Delta comE$  strain, calculated using ANOVA and Tukey post-test.
